# Supplementary material for: Requirement of CHROMOMETHYLASE3 for somatic inheritance of the spontaneous tomato epimutation Colourless non-ripening
Source: PubMed Central journal article supplement (PMC4361866; doi:10.1038/srep09192), 2015-03-17
Supplement: srep09192-s1.pdf [file srep09192-s1.pdf]

---

**Requirement of *CHROMOMETHYLASE3* for somatic inheritance of the spontaneous tomato epimutation *Colourless non-ripening***

Weiwei Chen<sup>1\*</sup>, Junhua Kong<sup>1\*</sup>, Cheng Qin<sup>1\*</sup>, Sheng Yu<sup>2\*</sup>, Jinjuan Tan<sup>1</sup>, Yun-ru Chen<sup>2</sup>, Chaoqun Wu<sup>1</sup>, Hui Wang<sup>1</sup>, Yan Shi<sup>3</sup>, Chunyang Li<sup>3</sup>, Bin Li<sup>1</sup>, Pengcheng Zhang<sup>1</sup>, Ying Wang<sup>1</sup>, Tongfei Lai<sup>1</sup>, Zhiming Yu<sup>1</sup>, Xian Zhang<sup>1</sup>, Nongnong Shi<sup>1</sup>, Huizhong Wang<sup>1</sup>, Toba Osman<sup>3</sup>, Yule Liu<sup>4</sup>, Kenneth Manning<sup>3</sup>, Stephen Jackson<sup>3</sup>, Dominique Rolin<sup>5</sup>, Silin Zhong<sup>2</sup>, Graham B. Seymour<sup>6</sup>, Philippe Gallusci<sup>5</sup>, Yiguo Hong<sup>1,3</sup>

<sup>1</sup>Research Centre for Plant RNA Signalling, College of Life and Environmental Sciences, Hangzhou Normal University, Hangzhou 310036, China. <sup>2</sup>State Key Laboratory of Agrobiotechnology, School of Life Sciences, The Chinese University of Hong Kong, Hong Kong. <sup>3</sup>School of Life Sciences, University of Warwick, Coventry CV4 7AL, UK. <sup>4</sup>MOE Key Laboratory of Bioinformatics, Centre for Plant Biology, School of Life Sciences, Tsinghua University, Beijing 100084, China. <sup>5</sup>UMR Fruit Biology and Pathology, Bordeaux University, INRA, Villenave d'Ornon 33883, France. <sup>6</sup>Plant and Crop Science Division, University of Nottingham, School of Biosciences, Loughborough, Leics LE12 5RD UK.

Running title: *SICMT3* modulates maintenance of tomato *Cnr* epiallele

\*These authors contributed equally to this work.

Correspondence author: Yiguo Hong ([yiguo.hong@warwick.ac.uk](mailto:yiguo.hong@warwick.ac.uk) and [yiguo.hong@hznu.edu.cn](mailto:yiguo.hong@hznu.edu.cn)). Research Centre for Plant RNA Signalling, College of Life and Environmental Sciences, Hangzhou Normal University, Hangzhou 310036, China.

Co-correspondence author: Silin Zhong ([silin.zhong@cuhk.edu.hk](mailto:silin.zhong@cuhk.edu.hk))

---

## Supplementary Figure Legends

### Supplementary Figure 1 | Post-transcriptional and transcriptional silencing of

***LeSPL-CNR* inhibits fruit ripening.** **a**, Outline of the *LeSPL-CNR* ep locus<sup>3</sup>. The two exons for the *LeSPL-CNR* mRNA and the hypermethylated (5<sup>m</sup>C) region upstream of exon 1 are indicated. The 286-bp DNA fragment was PCR amplified and cloned into the *Clal/EagI* sites of PVX/GFP<sup>3</sup> to generate the ViTGS vector PVX/Pcnr-GFP. **b**, A wild-type AC fruit inoculated with PVX/GFP ripens normally. **c**, Post-transcriptional VIGS of *LeSPL-CNR* by PVX/m*LeSPL-CNR* blocks AC fruit to ripen, showing non-ripening sectors. PVX/m*LeSPL-CNR* expresses a non-translatable *LeSPL-CNR* mRNA that triggers silencing of endogenous *LeSPL-CNR* mRNA. **d-e**, Transcriptional ViTGS of *LeSPL-CNR* by PVX/Pcnr-GFP that contains specific RNA targeting the 286-bp region of *LeSPL-CNR* promoter inhibits fruit ripening. AC fruits injected with PVX/Pcnr-GFP RNA developed non-ripening sectors. **f**, Semi qRT-PCR assays with 23 and 28 cycles of amplification revealed that the level of *LeSPL-CNR* mRNA were down-regulated in non-ripening green (Gr) sectors when compared to that of the ripe red (Red) sectors of two treated AC fruits. Total RNAs extracted from the dissected green and red sectors were pre-treated with DNase I prior to being reversely transcribed into cDNA with (+) and without (-, as negative control) reverse-transcriptase (RT). **g-h**, Bisulfite sequencing shows induction of DNA methylation in the 286-bp *LeSPL-CNR* promoter region in non-ripening (filled rectangles, **h**), but not in ripe (open rectangles, **g**) sectors of AC fruits inoculated with PVX/Pcnr-GFP. Electrophoretogram shows

---

sequences corresponding to the 5' end (-2480 to -2403) of the 286-bp *LeSPL-CNR* promoter region<sup>3</sup>(Supplementary Fig. 9i).

**Supplementary Figure 2 | Phylogenetic relationship among tomato and Arabidopsis DNA methyltransferases (DMTs).** Amino acid sequences of 10 AtDMTs including AtDRM1 (NM\_121542.2, AT5G15380), AtDRM2 (NM\_121466.2, AT5G14620), AtDRM3 (AY050882.1, AT3G17310), AtMET1 (NM\_124293.3, AT5G49160), AtMET2 (NM\_001203796.1, At4G14140), AtCMT1 (NM\_106722.2, AT1G80740), AtCMT2 (NM\_118020.4, At4G19020), AtCMT3 (NM\_105645.3, AT1G69770), AT4G08990 (NM\_116968.1) and AT4G13610 (NM\_117435.1) were downloaded from the NCBI database. Amino acid sequences of 9 tomato putative DMTs including SIMET1 (AJ002140.1, SGN-U323958), SICMT2 (SGN-U582753), SICMT3 (SGN-U579786), SICMT4 (SGN-U601004), SIDRM5 (NM\_001246974.1), SIDRM6 (SGN-U575586), SIDRM7 (TC161581), SIDRM8 (SGN-U565936), and SIDRM9 (EST583972), were identified in the tomato EST databases (NCBI database, TIGR database, Solanaceae Genome Network). The protein sequences for SICMT2, SICMT3, SICMT4, SIDRM7 and SIDRM9 were deduced from each of the corresponding full-length genes after RACEs (Supplementary Fig. 10). Phylogenetic relationship of DMTs was analyzed using ClustalW.

**Supplementary Figure 3 | Silencing of *SIDMTs* by different VIGS vectors displays various impacts on ripening of *Cnr* epimutant fruits. a-d, *Cnr* fruits treated with**

---

PVX/SICMT2. **e-l**, *Cnr* fruits treated with PVX/SIDRM7. **m-n**, *Cnr* fruits treated with PVX/SIMET1. **o**, *Cnr* fruits treated with PVX/SICMT4. **p**, Genetic *rin* mutant fruits treated with PVX/SICMT3. Tomato fruits at 5-15 days post anthesis (dpa) were treated with PVX/SICMT2, PVX/SIDRM7 or PVX/SIMET1 and these fruits broke and subsequently ripened, showing sectors with different degrees of ripening as well as non-ripening sectors (**a-n**). Ripening was assessed by red colour and pericarp softening as observed in the ripe wild-type AC fruits (Supplementary Fig. 5h). No ripening was observed in *Cnr* fruits inoculated with PVX/SICMT4 (**o**). Genetic *rin* mutant fruits at 5-15 dpa were treated with PVX/SICMT3 and these fruits remained unripe, showing characteristic of the *rin* phenotype (**p**). Photographs were taken at the indicated day post-anthesis.

#### **Supplementary Figure 4 | Silencing of *SICMT3* triggers early breaker of *Cnr* fruits.**

*Cnr* fruits at 5-15 days post anthesis (dpa) that were mock-inoculated (Mock), or inoculated with the empty VIGS vector PVX, PVX/SIDRM7 (DRM7), PVX/SIMET1 (MET1), PVX/SICMT2 (CMT2), PVX/SICMT3 (CMT3), PVX/SICMT3<sub>UTR</sub> (CMT3<sub>UTR</sub>) or PVX/SICMT4 (CMT4) broke at  $38.6 \pm 2.2$  (n=90),  $37.2 \pm 2.5$  (n=90),  $38.1 \pm 1.6$  (n=30),  $37.7 \pm 2.5$  (n=60),  $35.9 \pm 1.3$  (n=30),  $34.1 \pm 2.6$  (n=60),  $36.0 \pm 2.4$  (n=30),  $38.7 \pm 1.6$  (n=30) dpa, respectively. These data suggest that silencing of *SICMT3* influenced tomato fruit ripening. Breaker was judged when fruits started to turn from mature green to red or yellow. Asterisk (\*) indicates statistical significance between the *SICMT3*-silenced and the PVX control samples by Student's *t*-tests ( $p < 0.001$ ).



---

**Supplementary Figure 5 | Silencing of *SICMT3* by PVX/*SICMT3* reverses *Cnr***

**epimutant fruits to complete ripening. a-f,** *Cnr* fruits were treated with PVX/*SICMT3* at 5-15 days post anthesis (dpa) and these fruits broke and subsequently ripened fully. Ripening was assessed by red colour and pericarp softening as observed in the ripe wild-type AC fruits (**h**). Ripening *Cnr* fruits show sectors of red-ripening (RR), weak ripening (WR, light-red) and yellow-ripening (YR, mixed yellow-red), as indicated in (**e**). RR, WR and YR sectors eventually ripened completely. **g,** No ripening was observed in *Cnr* fruits inoculated with PVX. **h,** Ripening of wild-type AC fruits. Photographs were taken at the indicated day post-anthesis.

**Supplementary Figure 6 | Silencing of *SICMT3* by PVX/*SICMT3*<sub>UTR</sub> causes *Cnr***

**epimutant fruits to ripening. a-i,** *Cnr* fruits at 5-15 days post anthesis (dpa) were treated with PVX/*SICMT3*<sub>UTR</sub> and these fruits broke and subsequently ripened, showing sectors of red-ripening (RR), weak ripening (WR) and yellow-ripening (YR). Ripening was assessed by red colour and pericarp softening as observed in the ripe wild-type AC fruits (Supplementary Fig. 5h). Photographs were taken at the indicated day post-anthesis.

**Supplementary Figure 7 | *SICMT3* silencing affects expression of *LeSPL-CNR* and**

**key ripening TF genes. a-f,** Relative levels of endogenous *SICMT3* (**a**), *LeSPL-CNR* (**b**), *LeMADS-RIN* (**c**), *LeHBI* (**d**), *SLAP2a* (**e**), and *SITAGLI* (**f**) mRNAs in red-ripening

---

(RR), weak-ripening (WR) and yellow-ripening (YR) sectors of *Cnr* fruits inoculated with PVX/*SICMT3*<sub>UTR</sub> (*SICMT3*) at 41 days post inoculation. Student's *t*-tests indicates a statistical significance ( $p < 0.001$ ) of increase of the RNA level of each gene tested in the *SICMT3*-silenced samples when compared to that in the PVX control (asterisk). Level of mRNA of each gene in the mock-inoculated *Cnr* fruits (Mo) was included as references. **g-h**, Developmental regulation of master ripening TF gene expression. Semi-qRT-PCR reveals levels of mRNA of each TF gene in wild-type AC (**g**) and epimutant *Cnr* (**h**) young leaves (YL), fully opened flowers (OF) and pericarp tissues from fruits at immature green (IMG), mature green (MG), breaker (B), breaker + three days (B+3) and breaker + nine days (B+7) stages. The number of PCR cycles is indicated at the right of each panel. These results together with data in Fig. 3 suggest that in addition to maintaining the methylation of repetitive DNA and transposon-related sequences<sup>31</sup>, *CMT3* may also have a novel role in modulation of regulatory genes.

**Supplementary Figure 8 | Silencing of *SICMT3* affects expression of ethylene synthetic and signalling transduction genes. a-f**, Relative levels of endogenous *SIACS1* (**a**), *SIACS2* (**b**), *SIACS4* (**c**), *SIACO1* (**d**), *SIEBF1* (**e**) and *SIEBF2* (**f**) mRNAs in red-ripening (RR), weak-ripening (WR) and yellow-ripening (YR) sectors of *Cnr* fruits inoculated with PVX/*SICMT3*<sub>UTR</sub> (*SICMT3*) at 41 days post inoculation. Student's *t*-tests indicates a statistical significance in increase ( $p < 0.001$ ) of the RNA level of each gene tested in the *SICMT3*-silenced samples when compared to that in the

---

PVX control (asterisked). Level of mRNA of each gene in the mock-inoculated *Cnr* fruits (Mo) was included as references.

**Supplementary Figure 9 | Silencing of *SICMT3* reduces cytosine methylation in the epimutated region of the *LeSPL-CNR* promoter. a-h,** Targeted bisulfite sequencing shows the eighteen fully methylated cytosines in the 286-bp region of the *LeSPL-CNR* promoter in *Cnr* (solid-rectangles, **g-h**), but not in wild-type AC fruits (open-rectangles, **a**). *SICMT3* silencing reduced cytosine methylation in the CHG (red-asterisked) and CG (green-asterisked) context in red-ripening (RR), weak red-ripening (WR) and yellow-ripening (YR) sectors of fruits injected with PVX/*SICMT3* (*Cnr*+*SICMT3*, **d-f**) or PVX/*SICMT3*<sub>UTR</sub> (*Cnr*+*SICMT3*<sub>UTR</sub>, **b-c**). The increasing height of the thymidine (T) peak indicates a shift from methylated to non-methylated cytosine (asterisked). **i**, Nucleotide-coordinates correspond to the numbering of the *LeSPL-CNR* sequence<sup>3</sup>. Numberings of the eight hypomethylated cytosines in the *Cnr* promoter region of *SICMT3*-silenced fruits are also indicated in terms of their positions in the tomato genome sequence<sup>32</sup>.

**Supplementary Figure 10 | Full-length cDNA sequences of nine tomato *DMT* genes. a, *SIMET1*. b, *SICMT2*. c, *SICMT3*. d, *SICMT4*. e, *SIDRM5*. f, *SIDRM6*. g, *SIDRM7*. h, *SIDRM8*. i, *SIDRM9*.** Sequences highlighted red or blue indicate relevant sequences of corresponding cDNA fragments that were cloned into the PVX-based VIGS vector (Fig. 1b) for gene-specific RNA silencing of each of the targeted *DMT* genes.

**Supplementary Table 1** Nucleotide sequence similarities among VIGS targets and their full-length tomato DMT genes

|                                  | <i>SIMET1<sup>FL</sup></i> | <i>SIMET1<sup>VIGS</sup></i> | <i>SICMT2<sup>FL</sup></i> | <i>SICMT2<sup>VIGS</sup></i> | <i>SICMT3<sup>FL</sup></i> | <i>SICMT3<sup>VIGS</sup></i> | <i>SICMT3-UTR<sup>VIGS</sup></i> | <i>SICMT4<sup>FL</sup></i> | <i>SICMT4<sup>VIGS</sup></i> | <i>SIDRM5<sup>FL</sup></i> | <i>SIDRM6<sup>FL</sup></i> | <i>SIDRM7<sup>FL</sup></i> | <i>SIDRM7<sup>VIGS</sup></i> | <i>SIDRM8<sup>FL</sup></i> | <i>SIDRM9<sup>FL</sup></i> |  |
|----------------------------------|----------------------------|------------------------------|----------------------------|------------------------------|----------------------------|------------------------------|----------------------------------|----------------------------|------------------------------|----------------------------|----------------------------|----------------------------|------------------------------|----------------------------|----------------------------|--|
| <i>SIMET1<sup>FL</sup></i>       | 100.0%                     |                              |                            |                              |                            |                              |                                  |                            |                              |                            |                            |                            |                              |                            |                            |  |
| <i>SIMET1<sup>VIGS</sup></i>     | 100.0%                     | 100.0%                       |                            |                              |                            |                              |                                  |                            |                              |                            |                            |                            |                              |                            |                            |  |
| <i>SICMT2<sup>FL</sup></i>       | 28.4%                      | n.h                          | 100.0%                     |                              |                            |                              |                                  |                            |                              |                            |                            |                            |                              |                            |                            |  |
| <i>SICMT2<sup>VIGS</sup></i>     | 28.3%                      | n.h                          | 100.0%                     | 100.0%                       |                            |                              |                                  |                            |                              |                            |                            |                            |                              |                            |                            |  |
| <i>SICMT3<sup>FL</sup></i>       | 28.1%                      | n.h                          | 30.2%                      | 34.5%                        | 100.0%                     |                              |                                  |                            |                              |                            |                            |                            |                              |                            |                            |  |
| <i>SICMT3<sup>VIGS</sup></i>     | 34.7%                      | n.h                          | n.h                        | n.h                          | 100.0%                     | 100.0%                       |                                  |                            |                              |                            |                            |                            |                              |                            |                            |  |
| <i>SICMT3-UTR<sup>VIGS</sup></i> | 29.0%                      | n.h                          | n.h                        | n.h                          | 100.0%                     | 44.9%                        | 100.0%                           |                            |                              |                            |                            |                            |                              |                            |                            |  |
| <i>SICMT4<sup>FL</sup></i>       | 27.7%                      | n.h                          | 27.2%                      | 31.3%                        | 28.3%                      | 40.5%                        | n.h                              | 100.0%                     |                              |                            |                            |                            |                              |                            |                            |  |
| <i>SICMT4<sup>VIGS</sup></i>     | 26.9%                      | n.h                          | 30.5%                      | 30.5%                        | 31.4%                      | n.h                          | n.h                              | 100.0%                     | 100.0%                       |                            |                            |                            |                              |                            |                            |  |
| <i>SIDRM5<sup>FL</sup></i>       | 28.6%                      | n.h                          | 28.4%                      | 31.3%                        | 30.0%                      | 32.2%                        | 34.9%                            | 29.1%                      | 30.9%                        | 100.0%                     |                            |                            |                              |                            |                            |  |
| <i>SIDRM6<sup>FL</sup></i>       | 27.7%                      | n.h                          | 28.7%                      | 32.3%                        | 28.5%                      | 29.5%                        | 25.0%                            | 29.4%                      | 30.9%                        | 78.0%                      | 100.0%                     |                            |                              |                            |                            |  |
| <i>SIDRM7<sup>FL</sup></i>       | 26.8%                      | n.h                          | 28.2%                      | 29.1%                        | 30.1%                      | 25.9%                        | 32.2%                            | 28.8%                      | 30.5%                        | 75.3%                      | 75.4%                      | 100.0%                     |                              |                            |                            |  |
| <i>SIDRM7<sup>VIGS</sup></i>     | 30.4%                      | n.h                          | 29.6%                      | 29.6%                        | 28.3%                      | n.h                          | n.h                              | 30.4%                      | 30.6%                        | 29.6%                      | 32.6%                      | 100.0%                     | 100.0%                       |                            |                            |  |
| <i>SIDRM8<sup>FL</sup></i>       | 30.0%                      | n.h                          | 27.0%                      | 29.3%                        | 27.8%                      | 25.0%                        | 40.9%                            | 28.0%                      | 29.1%                        | 40.4%                      | 40.4%                      | 40.9%                      | 33.0%                        | 100.0%                     |                            |  |
| <i>SIDRM9<sup>FL</sup></i>       | 28.0%                      | n.h                          | 28.5%                      | 32.3%                        | 28.7%                      | 28.1%                        | 30.2%                            | 29.1%                      | 30.9%                        | 77.2%                      | 99.6%                      | 75.6%                      | 32.6%                        | 40.1%                      | 100.0%                     |  |

FL: Nucleotide sequences of full-length genes were used for comparisons. VIGS: VIGS-targeting sequences, which were cloned into the PVX vector for silencing specific genes (Fig. 1b), were used for comparisons. n.h: no nucleotide sequence homology was found.

Supplementary Table 2 Primers used for this study

| Primer/Construct    | Sequences (5' - 3')       | Gene or fragment amplified | Annealing temperature | Detection/Cloning sites              |
|---------------------|---------------------------|----------------------------|-----------------------|--------------------------------------|
| <b>Primers</b>      |                           |                            |                       |                                      |
| <b>PP269</b>        | CAAGGTGCGGAGGTTTACCAATC   | PVX mRNA (154bp)           | 50°C                  | qRT-PCR for PVX virus RNA            |
| <b>PP269-R</b>      | CCCCTCTAGATCATTAGCCGCTTC  |                            |                       | accumulation                         |
| <b>PP271</b>        | CGGCTACCACATCCAAGGAAGG    | 18S rRNA (188bp)           | 50-65°C               | Control gene                         |
| <b>PP272</b>        | GAGCTGGAATTACCGCGGCTG     |                            |                       |                                      |
| <b>SICMT3-S</b>     | AGTACCAGTTGCCCGGGCTTT     | SICMT3 (131bp)             | 50°C                  | qRT-PCR for <i>SICMT3</i> expression |
| <b>SICMT3-A</b>     | GAGATTCGTCATTGGAGACCAGTTC |                            |                       |                                      |
| <b>LeSPL-CNR-F</b>  | TGGAAACTAACAAATGGGAAGGG   | LeSPL-CNR (207bp)          | 58°C                  | PCR for <i>LeSPL-CNR</i> expression  |
| <b>LeSPL-CNR-R</b>  | GGCGATGGTATGGCTTGG        |                            |                       |                                      |
| <b>LeMADS-RIN-F</b> | AAGGAACCCAAACTTCATCAG     | LeMADS-RIN (119bp)         | 58°C                  | PCR for <i>LeMADS-RIN</i> expression |
| <b>LeMADS-RIN-R</b> | TTGTCCCAAATCCTCACCTA      |                            |                       |                                      |
| <b>LeHB1-F</b>      | CTACGACGAGCAGTCACCG       | LeHB1 (161bp)              | 58°C                  | PCR for <i>LeHB1</i> expression      |
| <b>LeHB1-R</b>      | GGAACCATACAGCCACCT        |                            |                       |                                      |
| <b>SIAP2a-F</b>     | GGAGTATGAATCCGATGAAGGT    | SIAP2a (184bp)             | 58°C                  | PCR for <i>SIAP2a</i> expression     |
| <b>SIAP2a-R</b>     | CGATTCCAAATGTGGTCTT       |                            |                       |                                      |
| <b>SITAGL1-F</b>    | GCAATAACTCCCTGCCTGTA      | SITAGL1 (140bp)            | 55°C                  | PCR for <i>SITAGL1</i> expression    |
| <b>SITAGL1-R</b>    | AGATGAAGAGCCTTGACCC       |                            |                       |                                      |
| <b>SIACO1-F</b>     | CACTAACGGGAAGTACAAGAG     | SIACO1 (101bp)             | 58°C                  | qRT-PCR for <i>SIACO1</i> expression |
| <b>SIACO1-R</b>     | CTGCATCACTTCTGGATTGTA     |                            |                       |                                      |
| <b>SIACS1-F</b>     | GTGCTTCAAACAAGGGAC        | SIACS1 (146bp)             | 50°C                  | qRT-PCR for <i>SIACS1</i> expression |
| <b>SIACS1-R</b>     | GTCCTAACCAAAGGCGAAT       |                            |                       |                                      |
| <b>SIACS2-F</b>     | GTAGGTGTTGAGAAAAGTGGAG    | SIACS2 (162bp)             | 55°C                  | qRT-PCR for <i>SIACS2</i> expression |
| <b>SIACS2-R</b>     | GTCTTAACGAACCTAATGGTGAGG  |                            |                       |                                      |

|                   |                                                                                                          |                         |      |                                         |
|-------------------|----------------------------------------------------------------------------------------------------------|-------------------------|------|-----------------------------------------|
| <b>SIACS4-F</b>   | ACACCGATTAACCGAGAGGC                                                                                     | SIACS4 (131bp)          | 50°C | qRT-PCR for <i>SIACS4</i> expression    |
| <b>SIACS4-R</b>   | CCCGTGGACGTAGCCAATTT                                                                                     |                         |      |                                         |
| <b>SIEBF1-F</b>   | ATTGCCATCACTGACATAGC                                                                                     | SIEBF1 (111bp)          | 58°C | qRT-PCR for <i>SIEBF1</i> expression    |
| <b>SIEBF1-R</b>   | AGTTATAGCAAGCGACCTC                                                                                      |                         |      |                                         |
| <b>SIEBF2-F</b>   | TTACCAGGTGTGTGGAAGG                                                                                      | SIEBF2 (136bp)          | 58°C | qRT-PCR for <i>SIEBF2</i> expression    |
| <b>SIEBF2-R</b>   | CCGACATTAGTAATACCACGA                                                                                    |                         |      |                                         |
| <b>SIMET1i-F</b>  | CGACGACAAGACCCTCTGCTAAGCGGCACAACC                                                                        | SIMET1 (250bp)          | 58°C | Construction of pRNAi-SIMET1            |
| <b>SIMET1i-R</b>  | GAGGAGAAGAGCCCTATTTGCCTGTGCTTGTGC                                                                        |                         |      | (intermediate vector, unpublished)      |
| <b>SICMT2i-F</b>  | CGACGACAAGACCCTCCGATGCAGGATCCCAA                                                                         | SICMT2 (436bp)          | 58°C | Construction of pRNAi-SICMT2            |
| <b>SICMT2i-R</b>  | GAGGAGAAGAGCCCTAAGGGAGATCAGAAAGTG                                                                        |                         |      | (intermediate vector, unpublished)      |
| <b>SICMT3i-F</b>  | CGACGACAAGACCCTCAAGGTAACCTCAAC                                                                           | SICMT3 (217bp)          | 58°C | Construction of pRNAi-SICMT3-3 and      |
| <b>SICMT3i-R</b>  | GAGGAGAAGAGCCCTGTCAATCCAATGTAGAAA                                                                        |                         |      | the silencing trigger RNA (intermediate |
|                   |                                                                                                          |                         |      | vector, unpublished)                    |
| <b>SICMT3i-F1</b> | CGACGACAAGACCCTGTTACACGAGCAGAGCC                                                                         | SICMT3 (275bp)          | 58°C | Construction of pRNAi-SICMT3-5 and      |
| <b>SICMT3i-R1</b> | GAGGAGAAGAGCCCTGGTGGTAATGTAAGTAATGG                                                                      |                         |      | the silencing trigger RNA (intermediate |
|                   |                                                                                                          |                         |      | vector, unpublished)                    |
| <b>SICMT4i-F</b>  | CGACGACAAGACCCTAAGGTGCGATGGA                                                                             | SICMT4 (253bp)          | 58°C | Construction of pRNAi-SICMT4            |
| <b>SICMT4i-R</b>  | GAGGAGAAGAGCCCTTTTCATCAGACAAT                                                                            |                         |      | (intermediate vector, unpublished)      |
| <b>SIDRM7i-F</b>  | CGACGACAAGACCCTGTTTACAATGAGAAGT                                                                          | SIDRM7 (260bp)          | 58°C | Construction of pRNAi-SIDRM7            |
| <b>SIDRM7i-R</b>  | GAGGAGAAGAGCCCTTATGTTCCGGTAGTGGA                                                                         |                         |      | (intermediate vector, unpublished)      |
| <b>Constructs</b> |                                                                                                          |                         |      |                                         |
| <b>PVX/SIMET1</b> | RNAi/PVX-F: GAT <u>ACGCGT</u> CCTTCGCAAGACCCTTCC<br>RNAi/PVX-R:<br>TTC <u>GTCGACT</u> TACCAAGGCCCTGAGGAG | SIMET1 fragment (359bp) | 58°C | <i>MluI/SalI</i>                        |
| <b>PVX/SICMT2</b> | RNAi/PVX-F: GAT <u>ACGCGT</u> CCTTCGCAAGACCCTTCC                                                         | SICMT2 fragment (525bp) | 58°C | <i>MluI/SalI</i>                        |

|                                 |                                                                                         |                                          |      |                  |
|---------------------------------|-----------------------------------------------------------------------------------------|------------------------------------------|------|------------------|
|                                 | RNAi/PVX-R:<br>TTCGTCGACTTACCAAGGGCCCTGAGGAG                                            |                                          |      |                  |
| <b>PVX/SICMT3<sup>UTR</sup></b> | RNAi/PVX-F: GATACGCGTCCTTCGCAAGACCCTTCC<br>RNAi/PVX-R:<br>TTCGTCGACTTACCAAGGGCCCTGAGGAG | 3' UTR portion of SICMT3<br>mRNA (306bp) | 58°C | <i>MluI/SalI</i> |
| <b>PVX/SICMT3</b>               | RNAi/PVX-F: GATACGCGTCCTTCGCAAGACCCTTCC<br>RNAi/PVX-R:<br>TTCGTCGACTTACCAAGGGCCCTGAGGAG | 5' fragment of SICMT3 mRNA<br>(364bp)    | 58°C | <i>MluI/SalI</i> |
| <b>PVX/SICMT4</b>               | RNAi/PVX-F: GATACGCGTCCTTCGCAAGACCCTTCC<br>RNAi/PVX-R:<br>TTCGTCGACTTACCAAGGGCCCTGAGGAG | SICMT4 fragment (342bp)                  | 58°C | <i>MluI/SalI</i> |
| <b>PVX/SIDRM7</b>               | RNAi/PVX-F: GATACGCGTCCTTCGCAAGACCCTTCC<br>RNAi/PVX-R:<br>TTCGTCGACTTACCAAGGGCCCTGAGGAG | SIDRM7 fragment (349bp)                  | 58°C | <i>MluI/SalI</i> |

Supplementary Figure 1 (Hong)

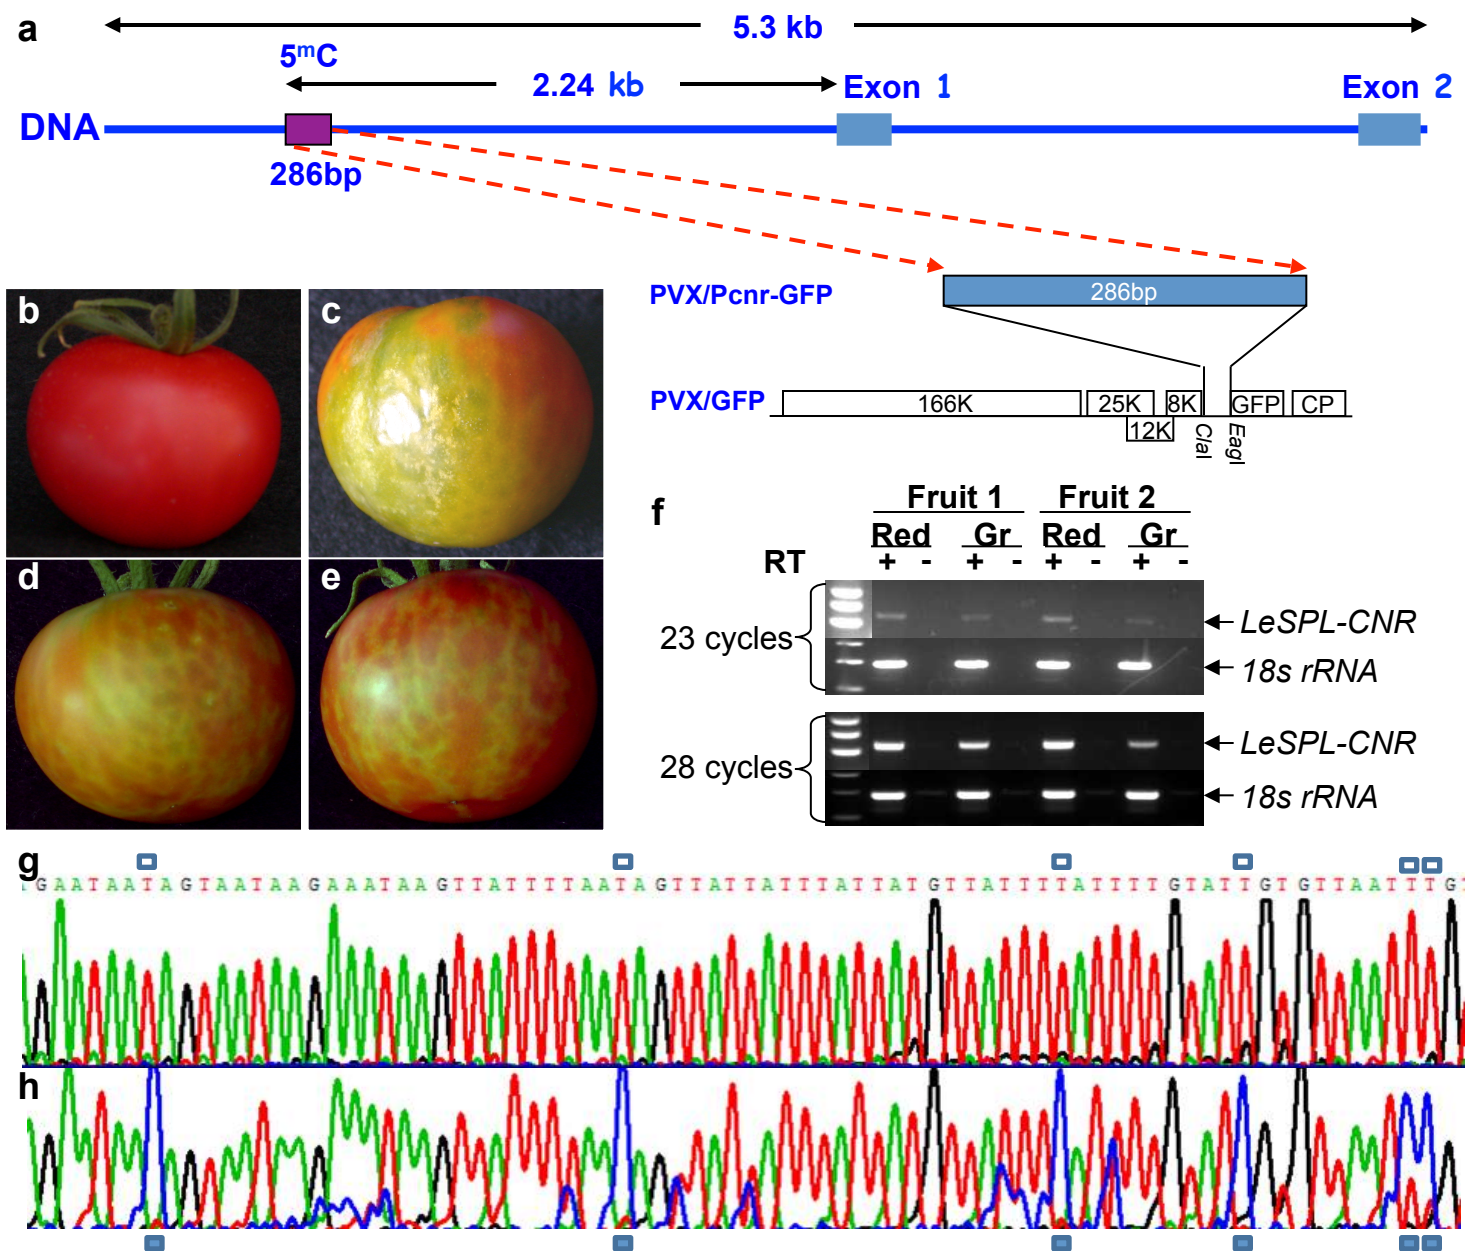



Supplementary Figure 2 (Hong)

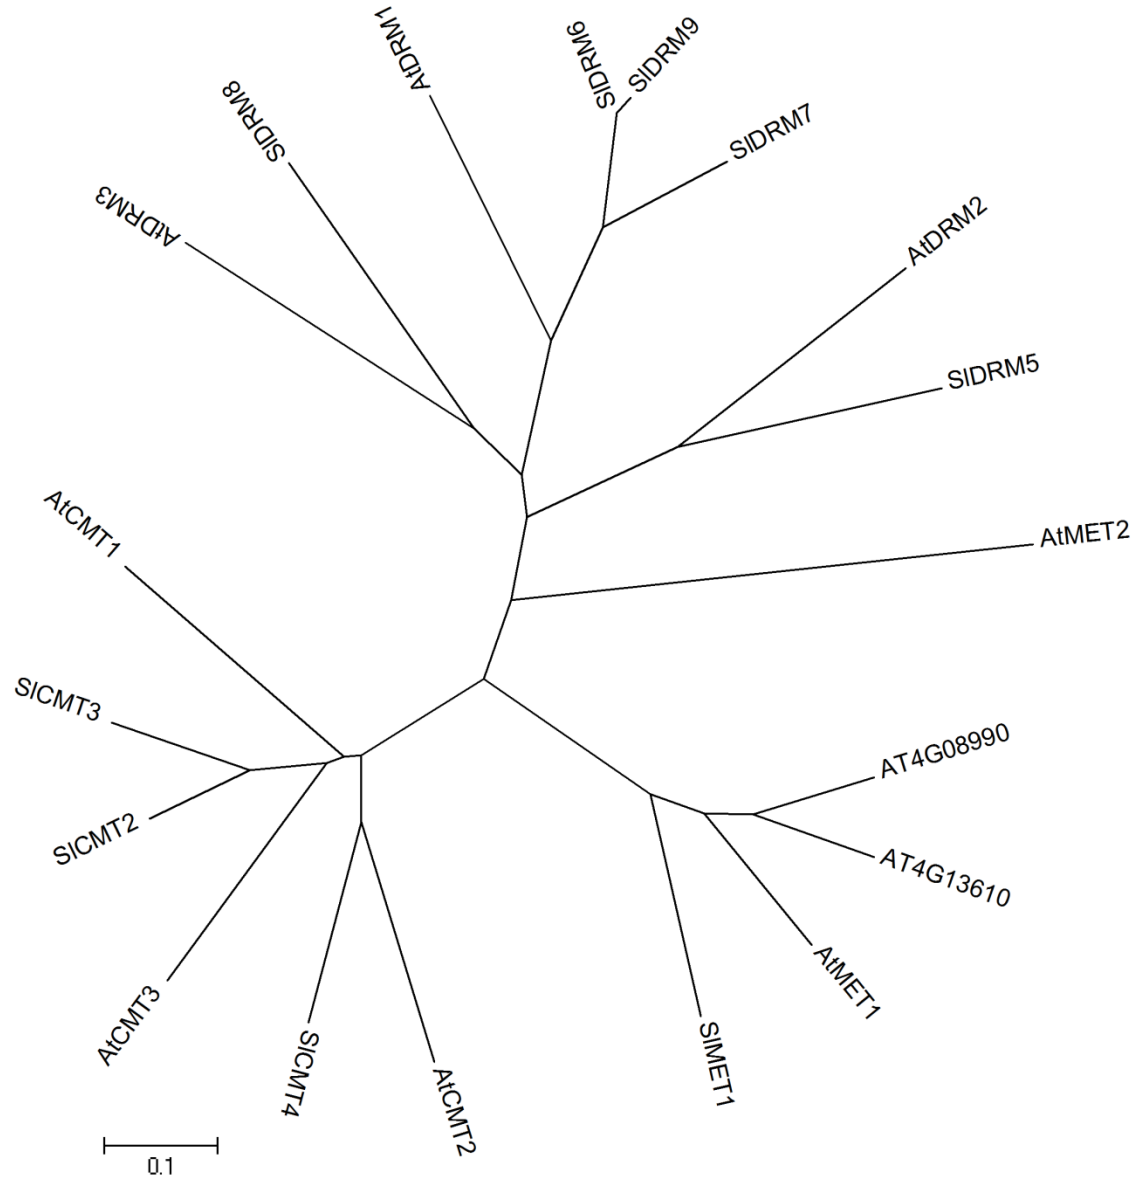

**Cnr + PVX/SICMT2**

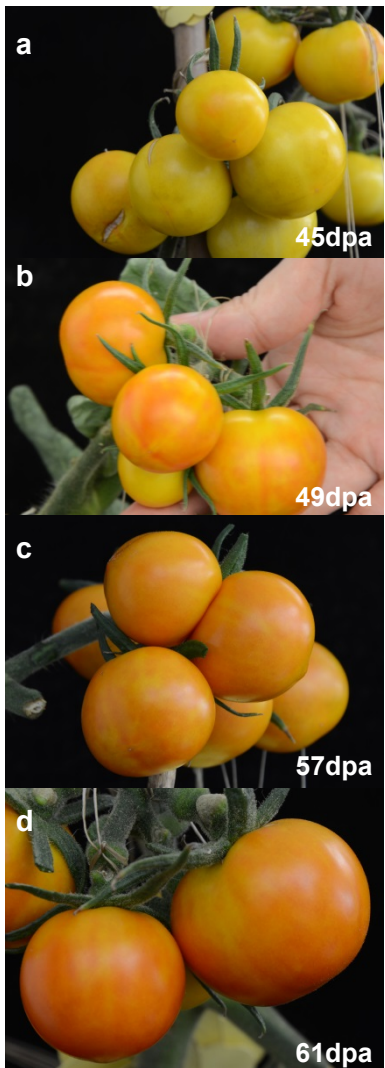

**Cnr + PVX/SIDRM7**

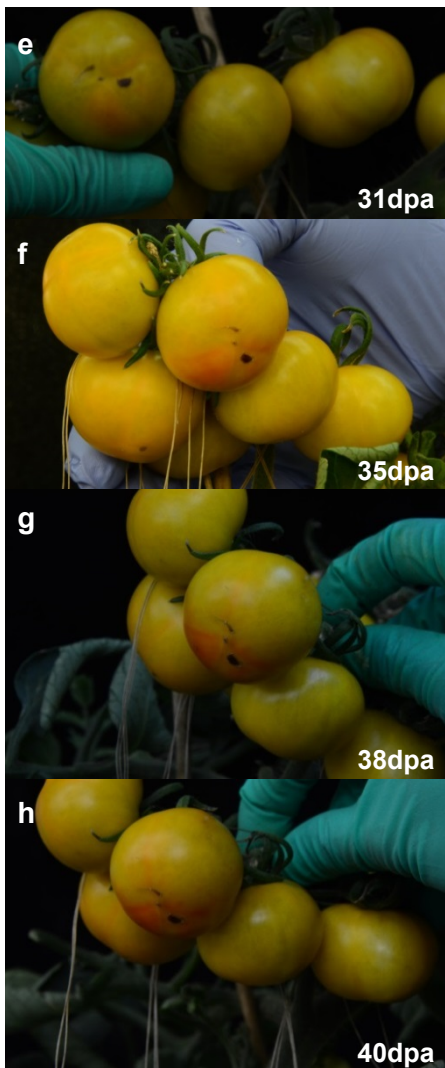

**Cnr + PVX/SIMET1**

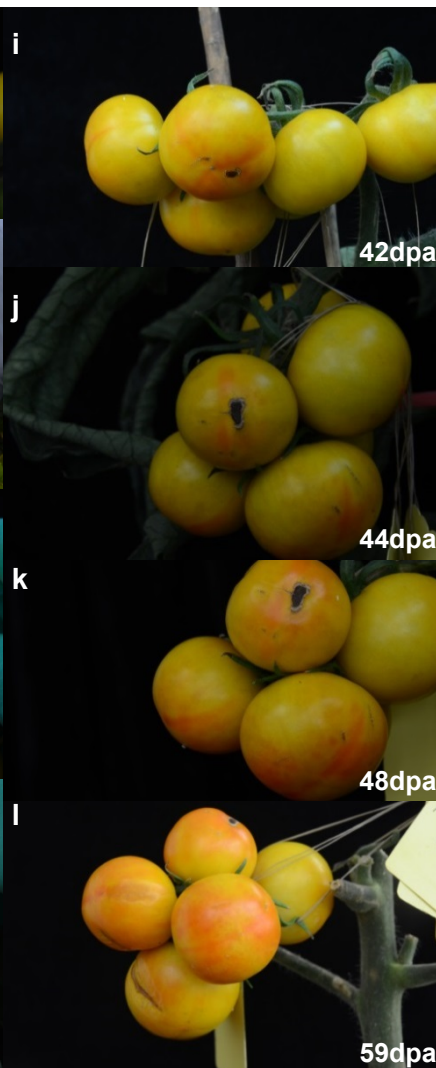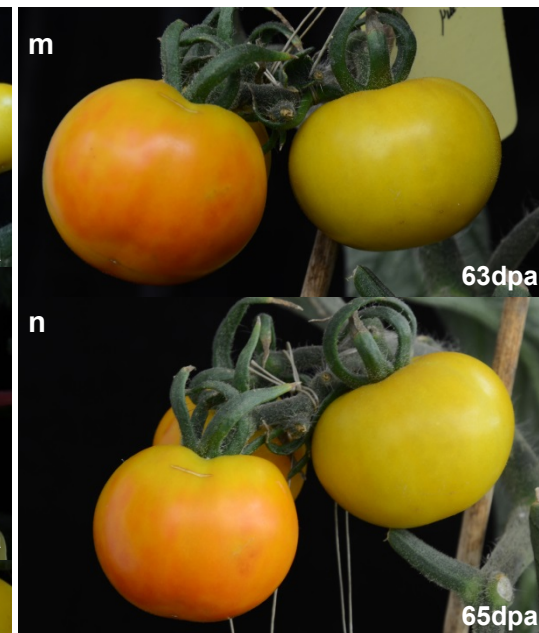

**Cnr + PVX/SICMT4**

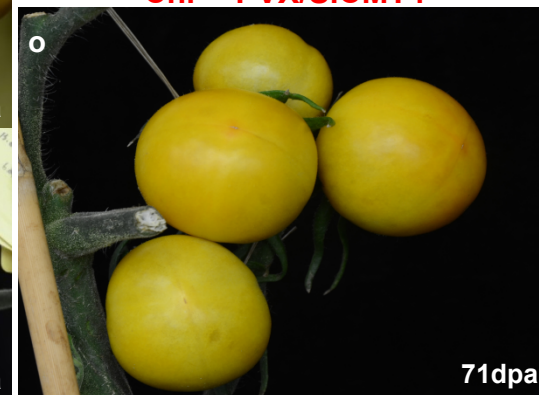

**rin + PVX/SICMT3**

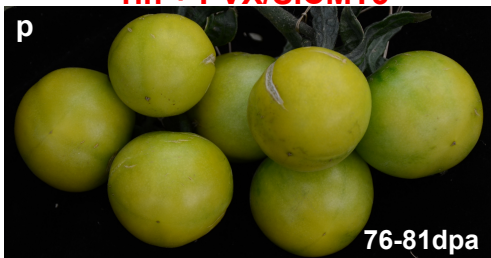

Supplementary Figure 4 (Hong)

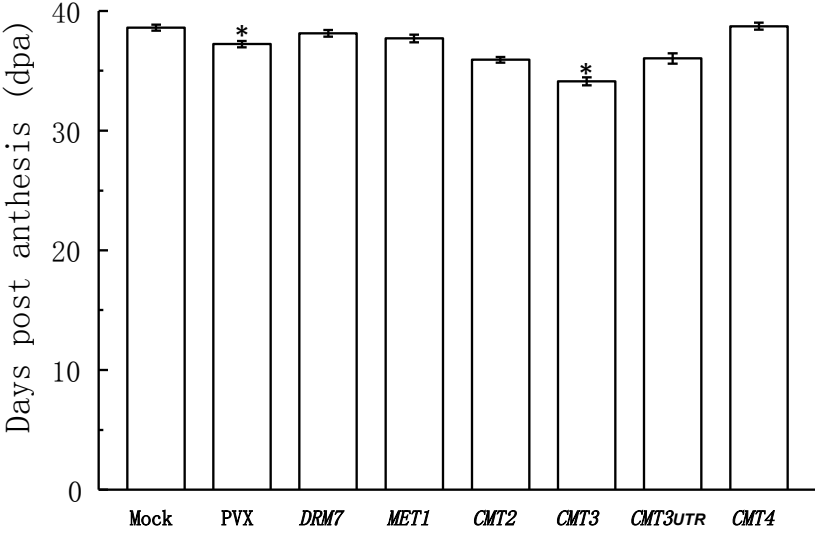

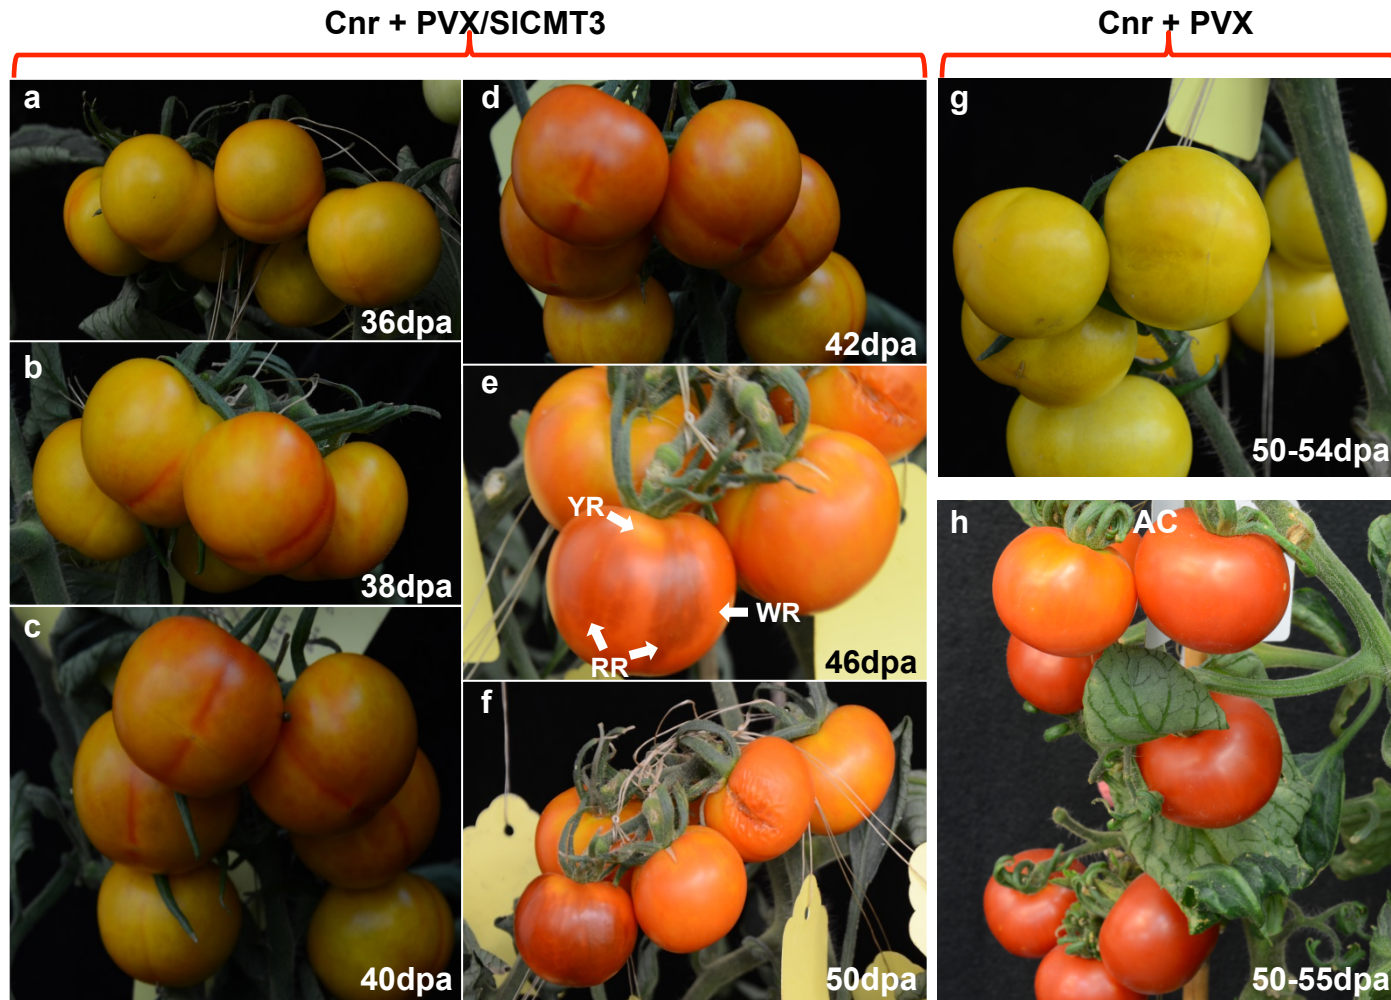



Cnr + PVX/SICMT3<sub>UTR</sub>

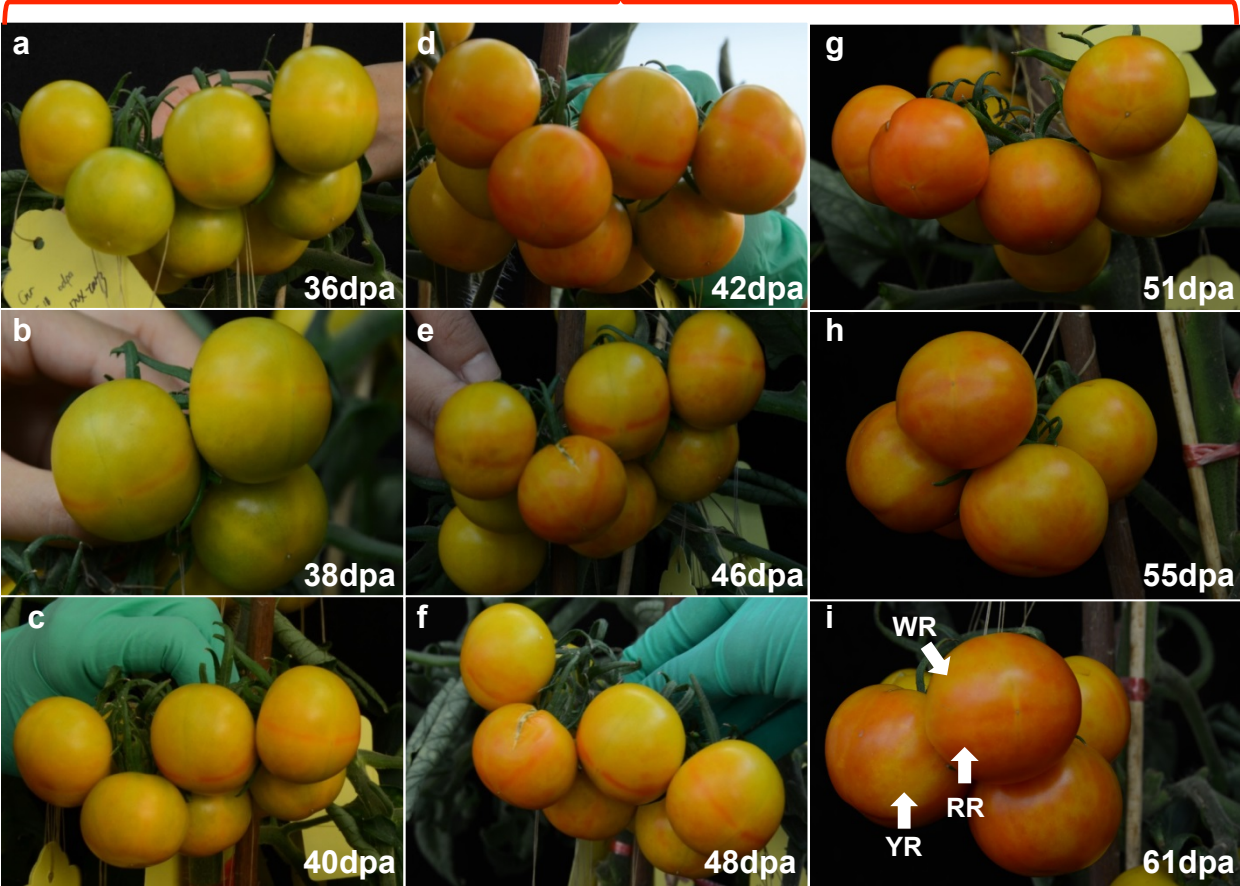



Supplementary Figure 8 (Hong)

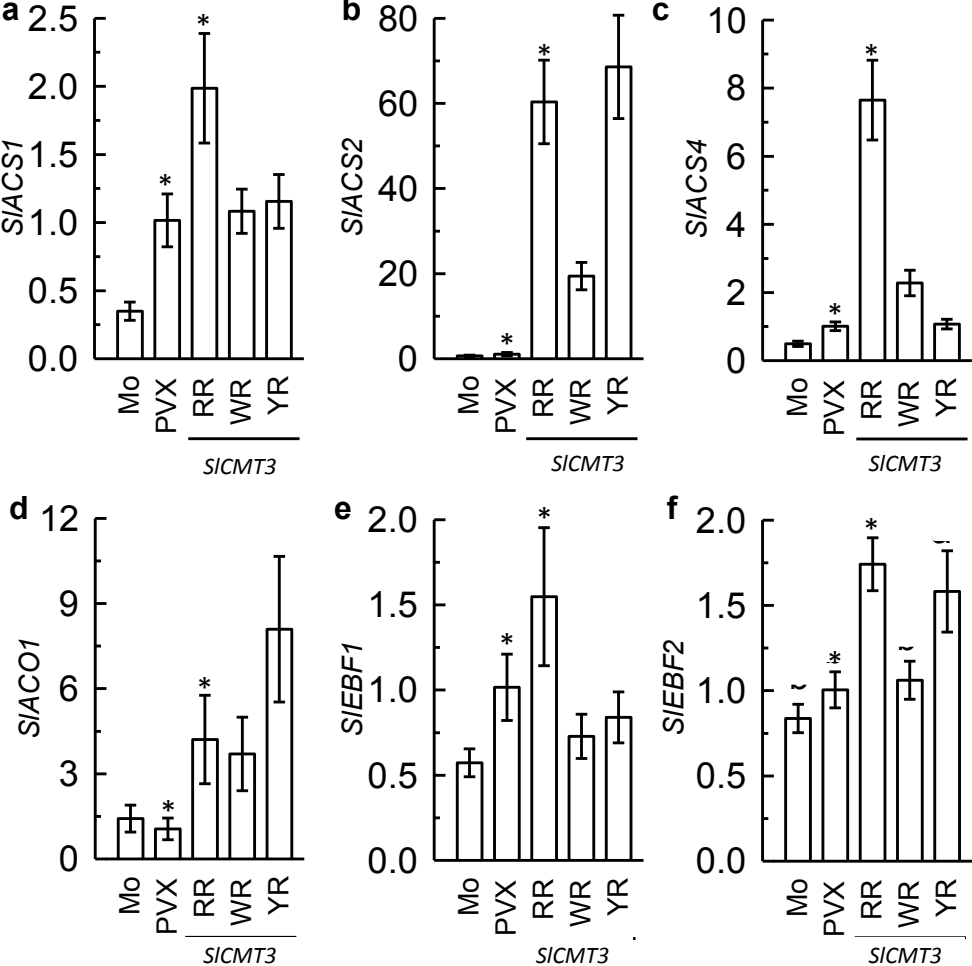

Supplementary Figure 9 (Hong)

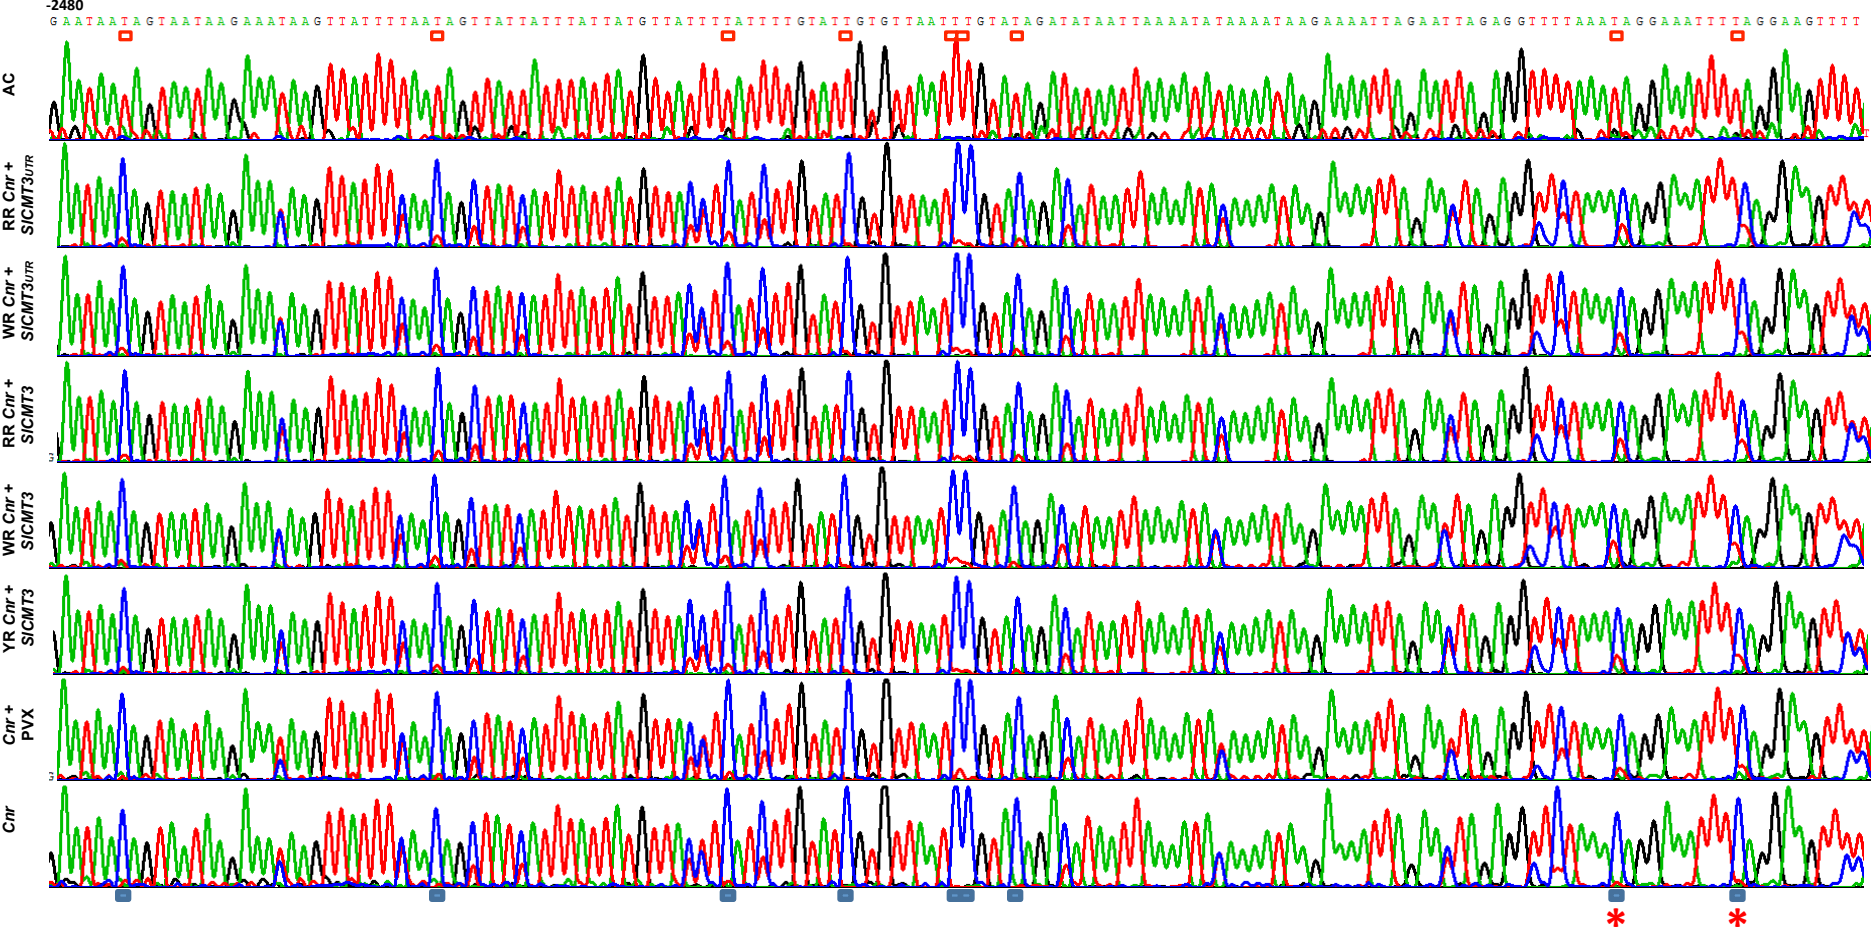



Supplementary Figure 9 Cont. (Hong)

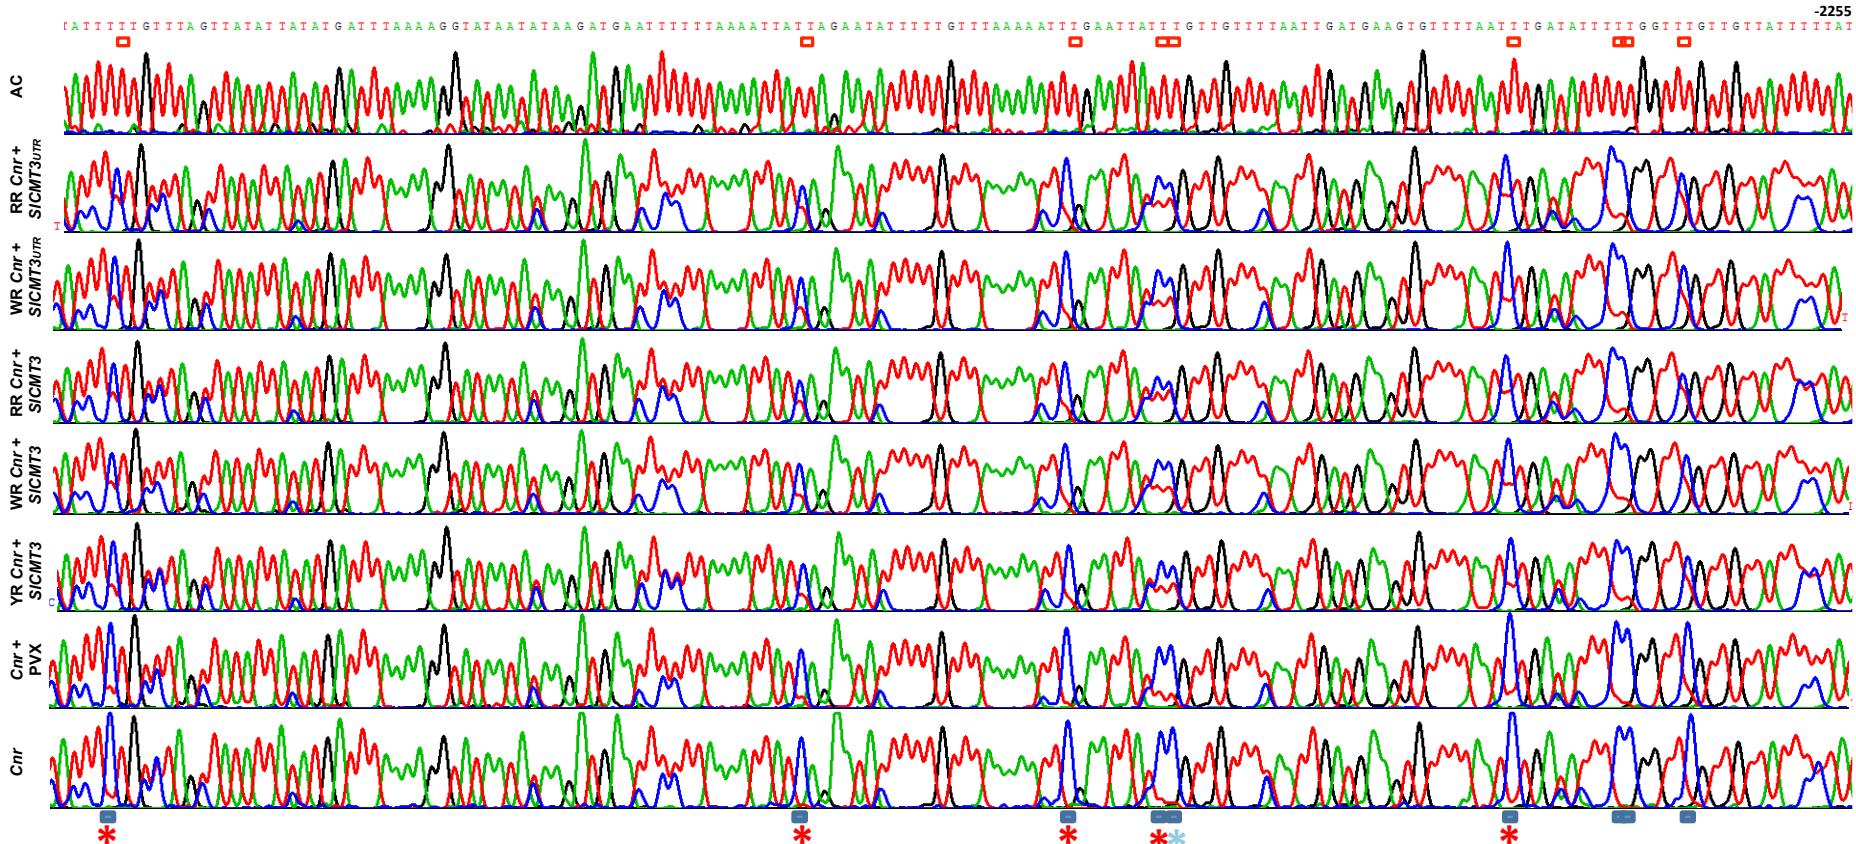

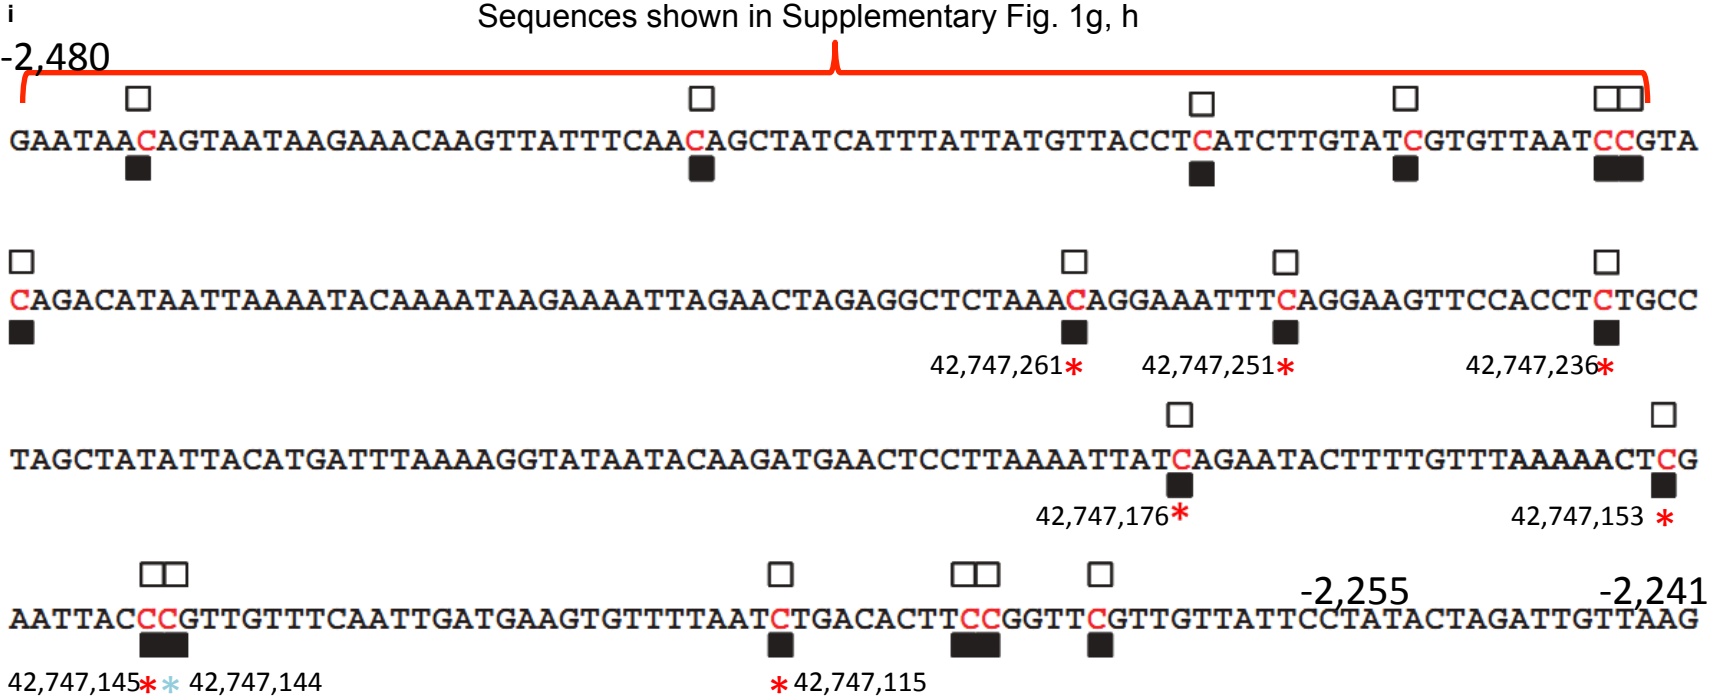

**a*****SIMET1*** (Sequences highlighted RED was cloned into PVX/*SIMET1*)

CCCGCCAAATCCCCCAAACCTATCTCATTTGTCCTCTTCCCTGTTGGAGAACTCAGCAACAGC  
ACACCCCATCTCCCTCAACTTCTCCGCCGACCAGCTTCTACTCTCCATTTCCGCCGAAAAATCAC  
CTTTCACCGGCAAAGCAGCAGCCTCTGGTCCCTCCTTTATCTTCTCCCTTCGCTGCTCTGGCCACC  
ATCGCTGGTCGCTGGCGAGAACTACAACGAAAATCCCTTCGCTCCGCTCTCCTCTCTCCCTCTTC  
CGCCGCCCTGCTCCTCACTTCTCACTTCTCCATTGAAGTCGACGGACGGGATAACGGCAGCGACGA  
CTGCTCCGCCCAGCTACTGTGGCGAAGTAGCAGCAAGCTGTGACCAGCAAACCTCGGCAAACCTCCGG  
CCAAAGCAGCGATAACAACCTCAGGCCAGCAGTGGGGCAGCAACGACTGCTCTGCCCAGCAGCTTTG  
GCGACGGCAAGCTGTGACCAGCAAACCTCCGGCGAAGCAGCGATAACAACCTCAGGCCAGCAGTGGGG  
CAGCAAACCTCCGGTTGGTGAGGATGGCGTCACCCCAACCTAATTCGGAGTCGGTATTAGAACTTCCG  
AACACGACAAATCTGGACACAAAAAGAACAACGCAAACAAGATTCTGTGTCAAAAAGGAAGGCA  
TCTGCAACTGGTAAGAAGGAAAAGAAAACAGGCTGTTTTCTGAAACTATTGAGGAGCCCACTGCTGGA  
CGTAAAAGGCCCTAAGCGAGCTGCTGCCTGTTTCAAGATTTTAAAGAGAAAATCTGTGCATTTATCAAAA  
AAGTCTTCAGTCATTGAAACAAGAAGGACCATTGTGTAGACGAAGAGGATGTAGCTATTAGGTTA  
ACTGCGGGTCTGCAAGAGTCTCAACGACCCTGTAGAAGATTAACGGATTTTGTTCATAACTCA  
GAAGGAATACCACAACCGTTTGAATGTCTGAGGTTGATGATCTGTTTATCAGTGGCCTCATTTTA  
CCACTTGAGGACAGTCTTGACAAAGTAAAAGCAAAGGAATTAGATGTGAAGGCTTTGGGCGTATT  
GAAGAATGGGCTATCTCTGGCTATGAAGATGGAACCTCTGTCATATGGATCTCAACTGAGACAGCT  
GATTATGATTGTTTAAAACCCCTCAGGTAGTTATAAGAAGTTTTATGACCACCTCTTGGCCAAGGCG  
ACGGCTTGCGTTGAGGTTTATAAGAAGCTTCAAAGTCATCTGGAGGGAATCCTGATTTAAGTCTT  
GACGAGTTGCTTGCAGGGTTGTCCGAGCGATGACTGGCATAAAAATGCTTTTCAGGTGGAGTATCC  
ATCAGGGACTTTGTCATCACTCAGGGCGGGTTCATATATAAGGAACTTATTGGTCTGGATGATACA  
TCAAAGAAGACTGATCAACTTTTTGTTGAGCTACCTGTCCTAGCTTCCCTTAGAGATGAAAGCAGC  
AAGCACGAGACACTTGCACAACCAGAGACTATATCATCTGGTAATGGTCTACGTATTGGCCCAAAA  
GCAGGAAATGGAGGAGACAAGATAGTTGAATCTGGTTTGGCCAATGGTCCAGCGCCAGAAGATGAA  
GATCTAAAATTGGCTAAATTGTTGCATGAAGAGGAGTATTGGTCTCCTTGAAGCAGAAGAAAGAC  
CGTAATACATCTTCCCTCATCCAGCAAAAATATACATCAAGATCAATGAGGATGAGATTGCAAGTGAT  
TATCCTTTACCTGCATATTACAAAACATCTAATGAAGAGACTGATGAGTATATTGTCTTTGACAGT  
GGGGTTGAAACATACCATATTGATGAGTTGCCTCGCAGCATGCTTCATAATTGGGCATTATACAAC  
TCGGACTCAAGGCTAATATCTTTAGAAGTCTGCCAATGAAAGCTTGTGCTGATATTGATGTAACC  
ATTTTTGGGTCTGGAGTGATGACTGCTGATGATGGGTCTGGCTACAATTTTGACACAGATGCTAAT  
CATTCTCTTCAGGTGGTTCTAGATCAGCTGAAATTGATGGAATGCCAATTTACCTGAGTGCTATA  
AAAGAATGGATGATTGAGTTTGGGTCTCAATGATCTTTATATCAATTCGGACTGATATGGCCTGG  
TATAGGCTTGGGAAGCCATTGAAACAGTATGCTCCTTGGTACGAACCAGTCATAAAGACTGCAAGA  
TTGGCAGTGAGCATCATTACTTTGTTAAAGGAACAGAATCGTGTGGCTAGACTTTCTTTTGGAGAA  
GTTATTAAAAGGGTTTCAGAGTTCAAGAAAGACCATCCTGCTTATATATCATCTAATGTAGATGCA  
GTGGAAAGGTATGTGGTTGTACATGGGCAAATTAATCTCCAGCAGTTTTCTGAATTTCTGATGTA  
AGCATTAGGAATTGTGCATTTGCGGTTGGTCTCTCAAGGAAAATGGAAGAGAGGCACCATACAAAA  
TGGGTGATTAAGAAGAAGAAGGTGATGCAGAGACTGGAACAGAACTTAAATCCTAGAGCATCTATG  
GCGCCATCTGTAAAAGGAAAGCTATGCAGGCTACTACAACAAGGCTAATCAACAGAATCTGGGGG  
GAATACTATTCCAATTACTCACCCGAGGTGTCAAAGGAGGTGGCTGATTGTGAGGTGAAGGATGAT  
GAAGAACCAGATGAGCAAGAGGAAAATGAAGAGGATGATGTTCCGGAGAGGAACTTGGATGTTCCA  
GAGAAAGCTCATACACCTTCTTCTACAAGAAGGCATATTAAGTCACGTTCTGACAGCAAAGAAATA

AACTGGGATGGGGAATCCATAGGTAAAAACAGCTTCTGGTGAACAGTTGTTTAAAAAAGCTAGAGTT  
 CATGGACATGAGATAGCTGTTGGAGATTCAGTTCTAGTGGAACATGATGAACCAGATGAGCTTGGT  
 TGTATTTACTTTGTTGAATACATGTTTGAAAAATTGGATGGTAGCAAAATGCTTCATGGAAAAATG  
 ATGCAACGAGGATCTGACACTGTACTTGGAAATGCAGCTAATGAGAGAGAGGTATTTTTGATCAAT  
 GAATGCATGAATCTGCAACTAGGAGATGTCAAAGAAAGTATAGCTGTCAATATCAGAATGATGCCT  
 TGGGGACACCAGCATAGAAACACGAATGCTGATAAACTTGAAACAGCAAAAGCAGAAGACAGAAAG  
 AGGAAGGGATTGCCGACGGAATTTTACTGCAAAGCTTTTATCGCCCTGAAAAAGGTGCTTTTTTC  
 AGACTCCCGTTTGATAAGATGGGCCTTGGTAATGGTTTATGCTACTCTTGTGAGTTGCAGCAAAT  
 GATCAGGAAAAGGAATCCTTTAAGTTTGATATGTCCAAATCCAGTTTTGTATATCTGGGGACTGAG  
 TATTCAGTTGATGACTTTGTTTTATGTAAGCCCGATCACTTTACTGCAGAAAGAGGGGGAAATGGA  
 ACTTTCAAAGCCGGAAGAAATGTGGGGTTGATGGCCTATGTAGTATGTCAATTAAGTAAATGTT  
 GGACCTAAGGGATCTAAACAAGCTAAAGTAGATTCTACAAATGTTAAAGTCAGAAGATTCTTCAGA  
 CCAGAGGATATATCTTCAGATAAGGCATACCTCTTCTGATATCCGGGAGATCTATTACAGTGAAGA  
 TATACATACAGTTCCGTGTTGAAATAATCAAAGGAAAATGTGAAGTGAGGAAGAAGTATGATATTTCT  
 CTCTGAAGATGTCCCTGCCATGTTTCGACCATATTTTCTTTTGTGAATATTTGTATGATCCATTGAA  
 TGGATCCCTTAAGAAGTTACCAGCTCAGATAAACCTGAGATTGTCAAAAATTAAGCTAGATGACGC  
 AACATCTAGGAAGAGGAAGGGGAAGGGAAAAGAAGGAGTGGATGAAGTTGGGGAACTAAATGAAAC  
 TTCTCCACAGAATCGTTTGTCCACATTAGATATCTTGTGTTGTGGTGGCTTGTCTGAGGGGTT  
 GCAGCATTCCGGTGTACAGATACAAATGGGCAATTGAATACGAAGCGCCTGCTGGAGATGCATT  
 TAGACTTAATCATCAAAGACAAAGGTGTTTCATACATAATTGCAATGTGATTTTGAGGGCTGTCAT  
 GCAGAAGTGTGGAGATTCTGATGACTGTATCTCAACTCCAGAGGCTTCTGAATTAGCTGCAGCAAT  
 GGATGAGAGCGAACTGAATAGTTTGCCTGCTGGACAAGTTGATTTTCAATTAATGGAGGCCCTCC  
 TTGTCCAGGGTTTTCTGGAATGAATAGATTTAATCAGAGCACCTGGAGTAAAGTACAGTGTGAGAT  
 GATTCTGGCATTTTTATCCTTTGCTGATTATTATCGGCCAAGTTTTTCTCTTGGAGAATGTTAG  
 GAATTTTGTTCGTTCAACCAAAAAACAAACATTTTCGCTTAACTGTTGCTTCCCTTCTTGAGATGGG  
 TTATCAGGTTAGGTTTGGTATCCTTGAAGCCGGAGCGTATGGAGTTCCTCAGTCTAGGAAGAGAGC  
 ATTTATCTGGGCTGCCTCCCCAGAGGAGGTTCTTCCAGAGTGGCCAGAACCAATGCATGTTTTTGC  
 TGTCCAGAAATTAATAATCGCATTATCTGAACTTCATACTATGCAGCTGTGAGGAGTACTGCTAG  
 TGGAGCTCCATTCGTTCACTTACTGTGAGAGACACAATTGGAGATCTTCTGTTGTTGGCAATGG  
 GGCAAGCAAGACTTGCATAGAGTATCAAGGTGATCCAGTATCCTGGTTCCAAAAGAAAATCCGGGG  
 CAGCTCAATAACATTATCTGATCACATTTCAAAGAGATGAATGAGCTTAACCTAATCAGGTGCCA  
 AAGAATCCCCAAGCGCCAGGAGCTGATTGGCGTGACCTTGAAGATGAAAAGGTTAAACTATCTAA  
 TGGTCAACTAGTTGATTTGATTCCATGGTGCCTGCCTAACA **CTGCTAAGCGGCACAACCAGTGGAA**  
**GGGGCTCTTTGGAAGGTTGGATTGGGATGGGAACTTCCCACTTCTATTACTGATCCCCAGCCGAT**  
**GGGCAAGGTGGGGATGTGCTTTTCATCCAGATCAAGACAGGATTGTTACAGTTCGTGAATGTGCACG**  
**TTCTCAAGGTTTCCAGACAGCTACCAATTTGCTGGTAACATCTTGCACAAGCACAGGCAAAAT**AGG  
 AAATGCTGTTCCACCTCCTTTGGCATATGCGCTTGAAGAAAACCTCAAAGAAGCTGTTGAGAGCAA  
 AAATAGGCTCACTTAGAACTTTTTTAAGCTGTGAATTTTACATGCATGTCAATTACCATTACATT  
 GCCAAATTATATCAGTTACTCATTATTAATTTGCAGTTTACCTATAACCCTCTATTTAGAGGT  
 TGGGTTCAAACAAAAAAATTAACAAAAA

**b**

**SICMT2** (Sequences highlighted RED was cloned into PVX/SICMT2)

CAGAGAAAATCAGTGAGTTTGTGGTGAAAGGCTTCAAAGCAAATCTTTGCCGTTGCCTGGTGATG

TTGATGTTGTATGCGGTGGACCACCTTGCCAAGGAATCAGTGGGTCAATCGTTTTAGGAATAAAG  
 AAAAT **CCGATGCAGGATCCCAAAAATAACAACCTTGATGTCTACATGGACATTGTGGATTTCTTGA**  
**AACCCAGGTTTGTATTAATGGAGAATGTGGTGGACCTTGTCAAATTCCTCAATGGTTTCCTTGGGC**  
**GATATGCATTGAGCAGACTTGTAGGGATGAACTACCAAGCACGGATGGGAATGATGGCAGCTGGTG**  
**CGTATGGTCTTCCACAATTTTCGTATGCGTGTTCATGTTTGGAGCTCTTTCATCAGAGAAGTTGC**  
**CACAATATCCATTGCCACACATAAAGTTATTGTGAGGGGTATTATCCCGTAGAATTTGAGTCAA**  
**ACACAGTTGCGTATGATTCAGTCAGGGATCTCGAGTTAAAGAAAGAACTCTTTCTTGGTGATGCAC**  
**TTTCTGATCTCCCTT**TGGTGGAGAACAATGAGCCAAGAGATGAAATGCCTTACACTGATGAGCCTA  
 AATCTGATTTCCAGCATTTTATAAGAATGGGGAGGGATGGGTGTTGTTGGGAAGCGTACTATATGATC  
 ATCGTCTCTTCAGTTGAACGAAGATGATCATCAGCGTGTATGTCAAATTCCAAAGCGGAAGGGTG  
 CAAACTTCAGGGACTTGCCCGGAGTTCGTGTTCCGCCAGATAATAAAGTTGAATGGGACCCAGACG  
 TGGAGAGAGTAAAGCTACCTTCTGGGAAGCCTTTGGTCCCTGACTATGCGATGAGCTTCGTTGGTG  
 GTAGTTCCCTCAAACCATTTGGTTCGTTTGTGGTGGGATGAAACTGTCCCAACAGTTGTGACGAGAG  
 CTGAACCCCATATAATCAGACCATAGTACATCCACTACAAGATAGAGTGCTCACAATTCGTGAAAAATG  
 CAAGGCTCCAAGTTCCTGACTACTACAAGTTGATAGGTCCAATAAAAGAAAGGTACATGCAAG  
 TAGGTAATGCAGTTGCAGTTCCAGTTGCCCGAGCATTGGGCTATTCTTTGGCCATGTCAATAAAGG  
 GATTATCTGGAGAAACACCATTGTTACCTTGCCAAAAAATTTCCCTTCTCATGAGGATCAGAATT  
 GTAATGAAGTGCACAATAATTTAAACATTAATAATTGAGATTACCAAATCTTTTACCCTCT  
 GTATGGGGGATGATTATTTTTAGGATCTTAGTTTTATTGATTAATTTGCCTTCAGACATTGTTTCA  
 CAATACAATCATGCCAATGTTGAAGCTGGTGAAGGCGTGGGTTTATGTAATAGCAAGGTGAACATG  
 TGTCATGTTCTATTCTAGTTCCAGAAAATGTATTTTTGAGCATTCAATTCATGTAACATTTCAAG  
 TTGTAAACTGTCAGAAAACATTTAGACACATTAATAAAAAAAAAAAAAAAAAAAAAA

c

**SICMT3** (Sequences highlighted Red is cloned into PVX/SICMT3; sequences highlighted Blue is cloned into PVX/SICMT3<sub>UTR</sub>)

CGGAGAAATTTGTGCTGGATAGTGAAGCTAGGAAAAAATGGCCTCATAGATATATTTTTAAAGGATAA  
 CGTGAATATAAATAGTGCATCTATGAGCTTAAATTGCCAACATGATTCGGACGAATTAATTCAGGC  
 CAAGTGCCATTTTGCACAAGCATTAGTTGATAATGTCATTTATAAACTTGGGGATGATGCATATGT  
 AAAGGCTGCAGAAGATGAAGATGATTACATATGCAAATTTGTTGAATTTTTTCAAGGTGTTGATGA  
 TATGAAGTATTTTACTGCTCAGTGGTTTTACAGAGCGAAGGATACCGTAATTAAGCTCATGACCA  
 GTTTATTGACAAGAAGCGTGTATTCTTGTGATATTAAGGATCACAAACCGCTTGATTGCCCTCGT  
 AAAAAAATCAAAATGTTCCAATATCCTCAAACGTAAGCTTACAATTCAGGAAAGTTTGCAGATT  
 AGAATGTGACTACTACTATGACATGAAGTACCTTGTCCCATTCTCATCATTTATTAGTTTACCATC  
 AGATGTTTTAAGTCCCTGATAGTGAATCAAATTCGACCATATCAAGTACGGTGTGTTGTGGAGGT  
 CAAAGAACAGAAGCAAGAAAAGAACTCTGGATCTTTATTCCGGTGTGGTGGAAATGTCTACTGG  
 GCTGTGCCTGGGTGCTGATGTTTGTGATGTTAACTTGTCACTAAATGGACTGTTGATCTAAATTG  
 TTATGCCTGTGATAGTTTTAAAGCAAACCACCAGAAACCGAGGTGAGAAATGAATCTGCTGAAGA  
 TTTCTTATTGCTTTTGAAGGAGTGGGAGCAGCTTTGTGCATCCTGCTCCTTATTGAAAAGCAATAC  
 CCCGACACATCCTTTGTTGAAAGTGGGAGATGCAAATGTGGAAGATGATGATGAAGGTGCAGATGA  
 TGATGATGGGGATCTGGTGTGATGAAGATGAAGGTGAAATTTTTGAAGTGAAGAGATCTTGAAGT  
 TTGTTATGGAGACCCGAAGGAAATAAAAAAGCCAGGCCTTTATTTAAGGTACGATGGAAGGGTTA  
 TGGCCAGATGAAGATACTTGGGAGCCTATAGAAGGCTTAGATGGCTGCCAAAACAAAATAAAGA  
 CTTTGTGACTGATGGCTTTAAAGAAGTGTTCCTGACATTACCTGGGCAAGTAGACGTCGTATGTGG

GGGACCTCCTTGCCAAGGAATAAGTGGCTTTAATCGTTTTAGAAATTCAGCAAATCCATTACAAGA  
 TCCAAAAATAAACAGCTTGAAGTATTCATGAGCATTGTGGAGTTCTTGAAGCCAAGGTTCTGTGT  
 AATGGAAAATGTGGTGGACTTGCTTAGGTTGCACATGGTTACCTTGGAAGATATGCACTAAGCAG  
 ACTTGTGGAAATGAACTACCAAGCACGGATGGGAATGATGGTTGCTGGGGCATATGGACTTCCACA  
 ATTTTCGTATGCGTGTCTTCATGTGGGGTGTCTTTCCTTCAGAGAAATTGCCACAATATCCGTTGCC  
 CACACATAACGTTATTTGTGAGGGGTGGCATTTCCACAGAATTTGAGTTAAATGCAGTAGATTTTGA  
 AGAAGGCCTGAAGGTCAAGCTAAAGAGAGAACCTTCTTCTCGAGGATGCACTTTCAGATCTTCCCTCC  
 TGTGGAAAATAATGAACCAAGGGATGAAATGCCATATATCGATGAGCCAAAATCAGTCTTTCAGCG  
 TTTTATAAGATCAAGGAGGGATGGTACGTTGGGTACTGTTTTGTATGATCATCGTCCCCTTCAGTT  
 AAACGAAGATGACTACCAGCGTGTAACTCAAATTTCCAAACAAAAGGTTGCAAACCTTCAGGGACTT  
 GCCTGGGGTTCTGTTCGTGCTGACAATGTTGTTGAATGGGATCCAGATATGGAAAGAGTAAAAC  
 TCCATCAGGGAAGCCTTTGGTTCTGACTATGCAATGACTTTTTGTTCTGCGTGGCACTTCACAAAAGCC  
 ATTTGGTTCGTTTATGGTGGGATGAAATTTGTTTCAACAGTT **GTTACACGAGCAGAGCCCCATAATCA  
 GGCTATATTACATCCAGTGCAGGACAGAGTGCTCACTATCCGTGAAAACGCAAGGCTGCAAGGTTT  
 CCCTGATTATTACAAATTGACTGGACCAATAAAAGAAAGGTACATACAAGTTGGAAATGCAGTTGC  
 AGTACCAGTTGCCCGGGCTTTAGGGTATTCTTTAGCATTGGCATTGAAAGGATTGTGCGGAGATCA  
 ACCATTACTTACATTACCAC**TAATTTTCCATGTCTTGAGGAACTGGTCTCCAATGACGAATCTCT  
 AGATAAGGTTTAAATTATCTGAACGTTACGT **CAAGGTACTAACCTCAACTGATTATTCCAAGTATTA  
 TCATTATTAGTTTACTGAAAACAGTTGTTGCAATGCAAGTTCTGCATTAACATTATATTTTTTTG  
 TTAGTTGCTAATTTAGGACAATGGAGAAGTTGGAAGTAGGTATTGTGTTTTTGTAGGTATCATTA  
 TTTCTACATTGGATTGAC**AACTTAACTTATTTGGTGCAAATGATAACTGTTGTATTGCAATGGTT  
 AAAAAAAAAAAAAAAAAAAAAAAAAAAAAAAAAAAAAAAAAAAAAAAAAAAAAAAAAAAAAAAAAAAAAA  
 AAAAAAAAAAGTACTCTGCGTTGATACCCTGCTTGCCTATAGTGAGTCGTATTAGAAGGGCAATT  
 CGTTTA

**d**

**SICMT4** (Sequences highlighted RED was cloned into PVX/SICMT4)

TCAACGCAGAGTACATGGGATGACCCAAAGCGCGTATTCTATTCTACTTTGGAGAATGATAATTTA  
 CTAGACTGCATAGTTTCCAAAGTTAACGTGGTAGAATTACCAACCAGGCATGATTTGAATAAAAAG  
 GATGTTCCACCTGCTCACTTTTTATTACGACATGGAATACTGTGTTGATTATTCCACATTCCGTACG  
 TTGCATAATGTCAAAGCTCTGTCTCCCCTTCGCTAGTTGATGTGTCATATAAGCCTATCACTACA  
 TATCCTCTGGAGGTATCACCAAGTTGTGAACCTATGAAAGTGGAGTTGTCATTATTGGATCTATAT  
 GCTGGTTGTGGCGGCATGTCAATGGGATTGTGCCTTGGCACAAAACCTCTCTGGTCTTAATCTTGTG  
 ACGAAATGGGCAGTTGATTTAATAAAGCTGCCTGTGATAGCCTGAAACTGAATCATCCTCAGACA  
 CATGTTAGGAATGAAGGTGTTGAGAATTTTCTAGAGCTACTGAAAAGATGGGAGAAGCTAATTAAG  
 TCGTACGGCTGTAGTGATATCAAACAAGCTCTAATATTGAGCTAGACGACAGAGATGAAGGCGAA  
 AACAATGATGATTCTCAGTCTGGTTCCAATGCATCTTCTGGAGAATATGAGGTATTAAGATTCTGTT  
 GACATATGTTACGGGGATCCCAACAATGACGGAAAATCTGGACTTCATTTT **AAGGTGCGATGGAAA  
 GGTTATGGTCCGAGTGAAGATACTTGGGAGCCAATTGAGAACTTGAAAAATTGCGGAGACAGTATA  
 AAAGATTTTGTTCGAAGGGGGCAACAGTTGAAAATTCTGCCTCTACCAGGTGACGTTGATATGATA  
 TGTGGGGTCTCCTTGCAGGGCATCAGTGGATATAATCGCCACAGAAATACTGATGACCCATTG  
 TCTGATGAAA**AAAAATCGTCAAATTATTATATTTATGGATGTTGTGGAATTCCTACGGCCTAAATAT  
 GTGTTGATGGAAAATGTTGCTGACATATTGAGGTTGATAAAGCATCTCTTGGAAAGATATGCTTTA  
 AGCCGTTTGGTACATATGAGATACCAAGCAAGACTTGGAACTATGGCAGCTGGTTGTTATGGTCTT

CCACAATTCCGATTGCGAGTTTTCTTTTGGGGTGCACCTCCAAGTGAGAGGTTGCCCCATTTCAC  
CTTCCTTCGCATGACGTGATTGTTAAATATTGGCCCTCACCTGAATTTGAGCGTAATACTGTTGCT  
TATGAGGAAGGACAACCACGTGACCTTGAGGAAGCTCTTGTTCTTCGTGATGCGATATCTGATATG  
CCAGCTGTACATGGCATGAAACTCGTGAAGAAAGGCCATATGAGATGCCCCCTGAAACAGAGTTC  
CAGAAATACATAAGATTATCTAAACATGAGATACTGAGTTGTACATCAACTGGAGTCAAGGAAACA  
AAAGAACCTGTTTTGTCTGATCATCGGCCTTGCCAACTAAACGAGGACGATTACTTGCGAGTTTTGT  
CTAGTCCCACGTAGAAAGGGAGCAAATTTTCAGGGACCTCCCTGGTGAATTGTAGGAGGGGATAAT  
GTGGCTCGTCTGATACTAAAGATCCAAAGGTTCTACCAAACGGAAAGCCCATGGTTCCCTGACTGT  
GCCTTTAACTTTGAGCATGGAAAGTCTAAGAGGCCATTTGCAAGGTTGTGGTGGGATGAAACAGTA  
GCAACATTAGTGACGTTTTCTAATCATCGCGCCAGGCTATCTTACACCCAGAGCAAGATCGAGTA  
CTGACCATACGAGAGTATGCAAGATTGCAAGTTTTTCAGATTTCTATAGTTTTACTGGTACTCTC  
AAGGAAAGATATTGCCAAGTTGGGAATGCTGTAGCAGTTCTGTTGGTCGCGCACTTGGGTACGCG  
CTTGGACTTGCCATCAGAGGCTAGCTGGAAATGAGCCTCTTATTAATTTGCCATCAAATTTCTCA  
TTCTTAACACCTCCAATTGATGACATTGTTGTCTTGCAAACATAAGCTCATATTCATCATTTTTTTT  
CCTCAATTGGCGATTTTCGGAGCTACTGCTGATACTTAGCGGATTACTCCATTTTTTCTAGTATGAAC  
TTCTATTTAACAGAACAGATACTAGACTGGGGCAGCCAAGTTGATTAATTTATTGATCAATGAACT  
AGCATTCCTTTTAAAAAAAAAAAAAAAAAAAAAAAAAGTACTCTGCGTTGATACCCTGCTTGCCCTATA  
GTGAGTCGTATTAGAAGGGCAATTCGTTTTAAACCTGCAGGACTAGTCCCTTTAGA

**e**

***SIDRM5***

GGCACCAGCTTCCTTCGCTCTCAAATCTATGATATTAAGAAGATTTATGATATAGCGCAGCACGGA  
GTTGCTTGACACCCTTTGATCGACAAGGATTTCTCAGGGTGCTCAATTACTCTTCGTGCTGAACACT  
TTAGAGTTCTTTTCAGGCTTACATTGTGAAATGGACAAACATCTTTCTGAAGAAGATAGTGACAAC  
ATTGACTGGGATACTGAAGATGAGTTAGAAATACAGGATACAACATTTTCCTCATGCAGGGATTTA  
AGAACTAATGGACAGTATGCTATTAGTGGTGATGGGGAGGCAAGCTCATCATCAGTACCTGGCCAG  
TCTACGTTTCATTCAGAAGTTTTTTAGTGATGGGATTTTTCTGAAGAGTCCATTGCAAAAGCAATAGAG  
CAAATGGAGAAAATTCAGATTTGGTGCTGGATGCTTTTTGACATTAAAGGCCATCGAAGATTCT  
CCTGAAGAACAGCCCAGTGCTAGCCCTCACCTGGAGCCCTGCATTAATTCTGATGATAGCTCTTCT  
GAATACAATGAGAATTTCTGGATGATGTTTATGATGAAGATAGTTGGTCCCTCTGACTCAGACTAC  
TGTACAAATTTCTGTTAAACAGTGCTATGTGAAAGAAGAGAGCAATTTCTTGTCTGAAAAAGAGCAG  
ACAATCTTATTTCTGGCAAATATGGGATACCCAGTGGAAGAGGTTTCTATAGCAATGGAGAGATGT  
GGTCCAGAAGCATCGGTTTTCTGAATTGACAGATTTCAATTTGTGCTGCTCAAATGGCAAGAGAAGAA  
GATCCCTATTTGCCAGAAGATGTAAAGCCAAAACCTGAACCATGGTAGTGGTGGATACAAGAAGAGG  
AAGATGTTCAATCAGTTGTGCAAAAGCAAAAAGCCAAGGGCGATTTTTGATGAAGAGACAATTCGT  
TTGCCCAAACCTATGATTGGATTTGGGGTTCCTACAGAATCAGTTTCTGCAATTGTCCGAAGAACT  
ATTCGGGAGCAAGCTTTTGGCCCCCTTTTTTCTATTACGAAAATGTTGCTCTAGCTCCAAAGGGT  
GTGTGGGATACCATTTCAGATTCCTATATGATATTGAGCCTGAGTTTGTGATTCAAAGTATTTT  
TGTGCTACTGCAAGAAAAGGGGTTATATTCATAACCTACCTACTGAAAATAGATTTCCCTTGCTT  
CCACTTCCTCCACGCACCATTAATGAGGCCTTCCCCTTACAAAGAAAATGGTGGCCATCTTGGGAT  
CCACGGACAAAGTTAAATGTTTGCAAACAGCTATTGGAAGTGCAAGATTGACTGATAGGATCAGG  
AAAGCTGTGGAGGCCTTTGACGGTGAGCCACCTATGAGGGTGCAAAAGTTTGTCTTGATCAATGT  
CGGAAGTGGAATTTGGTGTGGGTTGGGAGAAAACAAAGTTGCTCCTTGGAGCCAGAGAATTGGAAAT  
GCTATTGGGGTTCCAAAGAACCATAACCAGGGGAGGTGGTATAAGTAGGACCGATAGATACAAATCG

CTTGGTAACTCATTCAGGTTGACACAGTGGCATAACCATTTATCAGTGTTGAAAGACATGTTTCCA  
AATGGGATGAACGTCTTATCACTCTTCTCTGGGATTGGCGGTGCTGAAGTTGCTCTTTACCGTCTT  
GGGATTCAACTAAACAATGTGGTCTCTGTGGAAAAATCTGAAGTGAACAGAAACATTGTGAGAAGT  
TGGTGGGAGCAAACATAATCAGAGAGGCAATCTTATTGATTTTGGATGATGTGCAGCAGTTGAATGGA  
GACCGCTTAGAACAACTGATAGATTCATGTGGCGGATTTGATTTACTGATTGGTGGAAAGCCCGTGC  
AACAACTTGCAGGCAGTAACAGGGTGGCAGGGACGGTCTTGAAGGCAAAGAATCGTCTCTATTT  
TATGACTATGTTTCGGATACTGGACTTAGTCAAGTCCATAATGTCTAGACAGAGATAGTATGACAGA  
AATTCGTTCTAGCTTCAGATTTTTAGTTATCTTTCAAATTATGAAACATTACATTAAGGGATAAA  
GCCATCACATAAAATTTCTGGCTTAAGATTCTACATCGACTGGTCTCCTACAATACCAGTTGATGA  
GCATTCTATTTTCGCTTTGAAGCGAAAAACAAACATGAAGTGTAAAGTACATTGTTACTATTAGTTAT  
TGGCCTAACATGCCATTTTCAGTTGATGAGCATGCACAGTTACAGTGTGTATCCTCCATGAATAAT  
ATTCTGGAATTTGCATAAGAAAGCTCTGCACTTGAATCTCAAAAAAAAAAAAAAAAAA

**f**

***SIDRM6***

GTCCAGTGTTGGAAGCGTAAACTCCAAATATGGGAATCTCTCTTATGCTTTAAAACCAAACAAGA  
ATCTCTTCTTCGTCAATTTTCTCTAAAATCTATGGATATCTGATATAGATCAAATTTGATTGTTGC  
ATTGATCACTGAAAAATTTTCAGGGTGGCTGATTTATTCTTCTTGGCTGAACAAATTTGGAGTTCTTTTT  
CAGGCTTACCTTGAGAAATGGACAAAAATCTTCTGGAGAAGATAATGATGACATTGACTGGGATA  
CTGAAGATGAACTTGAATACAAGAAATACAGGACACAGTGTTCCTCATGCACGGATTTAAGAA  
CTACTGGGCAGCATGTTGTTTGTGCGATGTGGAGGCAAGCTCGTCATCAGTACCCTTCCGGTCCA  
AGTTCATTACAGCAGTTTGTAGTGTGGGATTTCTGAAGAATCTATTGCAAAGCAATAGAGCAAA  
ACGGAGAAAATTCAGATTTGGTGTGGATTCTCTTTTGACTTTTAAAGGCCCTTGATGACTCTCCTG  
AAGAACAGCCCAGTGTTAGCCCTCCGCTGGAACCCTCCATTAGTTCTGATGACAGCGCTTCTGAAT  
ACAACAAGATTGTTTTGGATAATGTTTATGAGGATGATAGTTGGTCTTCTGACTCAGACAACACTACA  
TAAATACTGTAAAGCAGTGCTACTTGAATGACGAGGGAAGTTCTTTGTCTGAAAAAGAAAAGATGT  
TATTGTTCTGGGAAATATGGGATATCCAGCGGAAGAGGCCTCCATAGCAATGGATAGATGTGGTC  
CAAAGCATCACTCCCTGAATTGGTAGATTTTATTTGTGCTGCTCAAATGTCAAGAGCGGAAGATC  
CCTATCTCCTAGAAGATGTGAAGCCAAACCTGAAGGATATATAGAAAGAATGAAGAGGATACAAAA  
AGAGGAAAATGTACAATGAATTGTGCAAACGGAAAAAGCAAAGGGAGATTTCTGTTGAAGAGCCAA  
TTCGATTGCCCAAGCCGATGATTGGCTTTGGAATTCCTACCGAATCAGTTCCAAGAATGGTTCAAC  
GAATTCCTCCCGAGAAAATCATTGGCCCGCCTTATTTCTATTATGAAAATGTCGCCCTGGCTCCAA  
AGGGTGTGTGGGACACCATTAAGAGGCATTTGTATGAGATTGAGCCCGAGTTTGTGACTCGAAGT  
ACTTTTCTGCAACTGCAAGAAAAGAGGGTATCTTCATAATCTGCCGATTGAAAACAGATTTCTCTT  
TGTTTTCCAATTCCCCACGGACCATTTCATGAGGCACCTTCCCCTTTCGAAGAGATGGTGGCCATCTT  
GGGATACTAGATCAAAGTTGAACTGCTTACAAACAGCCATTGGGAGTGCAAGGTTGACGGATAAGA  
TCAGGAAAGCTGTGAGAAGTATGATGGTGAACCACCTATGGAAATACAGAAGTATGTACTCTATC  
ATTGCAAGAAGTGAATTTGGTCTGGGTAGGAAGAAACAAAGTTGCCCTTTGGAACCTGATGAAG  
TTGAAATGCTATTGGGTTCCCAAAGAATCACACAAGGGGAGGAGGTATAAGTAGGACGGACAGAT  
ACAAGTCACTCGGTAACTCTTTCCAGGTTGACACAGTGGCGTACCACTTATCAGTGTGAGAGACT  
TGTTTTCAAATGGAATCAATGTCTTATCACTCTTCTCTGGCATTGGTGGTGTGAAAGTTGCTCTCT  
ACCGTCTCGGTGTTCCCCTCAACAATGTTGTTTTCAGTTGAAAAGTCTGAAGTGAACAGGAATATTG  
TGAGAAGCTGGTGGGAGCAAACAAATCAGAGGGGGAATCTCATACATTTTGACGATGTGCAGCTGC  
TGAGCAGAGATCGGTTGAAGAAGTTAATAGAATCAGTTGGTGGATTTGATTTAGTGATTGGTGGAA



GCCCATGCAACAACCTTGCAGGCAGTAACAGAGTGAGCAGGGATGGGCTTGAAGGCAAAGAGTCTT  
 CTCTGTTTTTTGATTATGTTCCGATATTGGATGATGTCAAGTCCATAATGTCTAGACATAGATGAG  
 ATACTCTCTCTCATTTAGATATCCTATTCCTTTTTCTCAACCTTGCCAAGGCTTAAGGTTATTCTT  
 AATTAGTAGGGTGAAATCAAACCTAGATACTAATTGCAATTATGAAACTGATGAAATTTTGGTGGTT  
 GATGAAGTAATGTTATTGTTTCTGGTTCAGTTTTTCCAGAACCCAGGTATCT

**g**

***SIDRM7*** (Sequences highlighted RED was cloned into PVX/SIDRM7)

GGTAGCTAAGTATATCTCCGATAACTAAATTTTGGGTGATGATTTATTTTTGTTGCTGCAGAGTTC  
 GGAGTTCTTTTTAAGGAATTACCTTTAAAAATGGATAACAACCTTTTCTGGAGAAGACAATGACAGC  
 ATTGACTGGGATACTGAAGATGAATTAGAAATACAAGAAATGCCGGATGCAACATTTTCTCGTGC  
 ACCAATTTAAGAAGTGTGGATATCATAACGTTAGTGGTCATAGGGAGGCAAGATCATCATCAGAA  
 CCATGTCAATCTAAGTTCATTCAACAATTTATCGTGATGGGATTTCTGAAGAGTCTATTGCAAAA  
 GCGATAGAGCAAAAATGGAGAAAATGAAGGTTTGGTGTAGATGCTCTTTTGACATTC AAGGCACTT  
 GAAGATTCTCTGAAGAACAGCCGAGTACGAGCACTCAGATGGAACCTGCATTACTTCTGATGAT  
 AGCTCTTCCAGTACAACGAAAACCTTTTGGATGATGTTTCTGAAGATGATAGCTGGTCTTGGAC  
 TCGGACAATTGTGTAATTTCTGCTAAACAGAGCTACTTGAATGACGACAACGTTCTTTGTCTGAA  
 AACGAGAAGACATTATTATTCCTAGCAAAATATGGGATACCCTGCGGAGGAGGCTTCCATCGCAATG  
 GAGAGATGTGGTCCAGAAGCACCGTTTCCGGAGTTGATAGATTTTATGTGTGCTGCTCAAATGGCA  
 AGAGAAGAAGACGTCATCTGCCCGAAGATGAAAAGCCAAAACCTAAATAGTGGTGGATACAAAAGG  
 AAGATGTATAATGAAGTTCGCGTAAAGAAAAAGCAAAGGGCGATAACTGATGAAGAGACAATTCAT  
 TTGCCAGACCTATGATTGGATTTCGGGGTTCTACGGAATCCTTACCAGCTGTTGTGAAAAGAACT  
 CTGCCAGAGCAAGCTATTGGCCCCCTTTTTTCTATTATGAAAATGTTGCTCTTGCTCCGAAGGGT  
 GTGTGGGACACTATGACAAGATTCCTTTACGATATTGAGCCCGAGTTTGTGACTCGAAATATTTT  
 TGCGCTACC GCAAGGAAAAGAGGATATATTCATAATCTACCAATTGAAGATAGATTTCTTTACTT  
 CCACTTCTCCACGTACCATTACGAGGCGTTTCTCTAACGAAGAAATGGTGGCCATCTTGGGAT  
 ACACGAACAAAGTTAAATTTGCTTACAAACATCTATTGGGAGTGCAAGGTTAGCTGATAGAATTAGG  
 AAAGCTATGAAAGCGATGGAGA ACTTCGATAGTGAGCCACCGTTGATGGTGCAAAAGTATGTTCTA  
 GACGAATGCCGAAATGGAATTTGCTGTGGGTTGGTAGAAa caATAAAGTCTCTCCTTTGGAGACT  
 GATGAATTTGAAATGCTAATGGGATTTCCACGGAATCATACCCGTGGAGGAGGTATAAGTAGGACC  
 GATAGATACAAGTCGCTTGGTAACTCGTTCAGGTCGACACAGTGGCATAACCATTTATCGGTGTTG  
 AAAGACTTGTATCCAAATGGTATAAATGTTTTATCACTATTTTCTGGAATTGGCGGTGCTGAAGTT  
 GCTCTGTATCGTCTCGGTATTCCATTGAACAATGTGGTTGCCGTAGAGATATCTGAAGTTAACAGG  
 AATATTCTGAGAAGCTGGTGGGAGCAAACAAATCAAAGGGGAATCTTATAGATTTCCATGATATC  
 CAGCAGCTGAACGGAGACGTCTTGAGCAAATGATCGATTCAATTGGAGGATTTGATTTAGTAATT  
 GCGGGAAGCCCCTGCAACAACCTCACTGGAAGTAACAGGGT GACTAGAGACGGACTCGAAGGTAAA  
 GATTCTTCTCTATTTTATGAC **TATGTTTCGGGTAGTGGACTTGGTCAAATCCATTATGTCTAATCGT**  
**AGAGTGTGACGAAAATATGTTTTGAGTTTCTGAACTTGGAAAGGCAACAAGTAAAAAGTTGTCTTTG**  
**ATTTTGGTTTGTACATATTTTTCTGTAAGGGGGCACAAGTAACTCTCTTAGTGCCATCCTAATA**  
**TAACTGTTGAACGTTTCGTGGAAAGAATGAAC TGTGAACTTCTCATTGTAAAC**GACATTAAATGAT  
 GTTGA AAAATGAACTTGTGATTTTCGCATAAAAAAAAAAAAAAAAAAAAAAAAAAAGTACTCTGCGT  
 TGATAACCACTGCTTGCCCTATAGTGAGTCGTATTAGAAGGGCAATTCGTTTAAACCTGCAGGACTA  
 G

**h*****SIDRM8***

GATATTTTGTTCATCAGCTGAATTAAGCTCTCTCAGCCTGAATTCATCTGAGCTCCGATCAGT  
TTTCGCCGCAGTTAAAGGCTCAAGGAAAGCACTGTTTTATGCTTTTGTCTGTGGCACATAAGAGACA  
ATTCTCTAGCTTCGCCCTGTCCAATTTACATTAATAATGCGTGAATATCCAGATAGTGAAAACCTCT  
TCAAAGCCTGAAGGTGTGAGTGAATCATGCCTAAAGTTGAAGATCCATATCCGAATTTCCATCT  
CTGTACACATATAACAATGCCTATGGGGGACAATATTGCAAGCTCATCAGGCAGCAATGTGAGGTCA  
TCTCTTCTGACCATGGGTTTTAAGGCATCACTTGTGATAAAGCAATTGAGGAAAAGGGTGAAGAC  
AACATTGACTTGTTACTGGAGACTCTTTTTGCAAAATCTGATCCTCCTAGAGCAGAATCATCAGAT  
TCTCTGGATAGTTTGTGTTTGTGATGACGAGGACATAAACAGTTCTGCCAAGTATGATGGAGATGCA  
CATATAAAGAGGTGAAGCTGCTCCTGTCAATGAACTAGTGGATGTAATCTTTCAGCTCGAATCG  
CTGGGAATTACAAAAAGATGATGATGATGATGTTTTCTGTTGTTGAGATTAAGAAAGGAACAAGG  
AATGCACAACCTGAGTCTCTGTTTGAACCATGGAGAAGACATTGAAATGCTTGAATGGGCTTCT  
CTGAGAATGAAGTTTCCACAGTTATTGAGAAGTTTGGTTCTGAAGTCTCCTCGAAGAGCTTGCAA  
ATCTGATTATAGATCCTAGTAGTAGAAGAAGAATGGACAAGCATCTCTTAACTCTCTCGGCAGGA  
ATGTTTCAATTGGTTTTAATCCAGTAGCTGTTAAGAAAGAGGAATATAGTGTGGATACCTCTGAAT  
CTAGAGAACCTTGACCTACTGGAAAAGCTTAAAGGAAACGGCCAAAGGAGAATTACATTGATGAGA  
TAGACACTAAGAGACCGAAATCAGAGTATGATGAAGCCTTAAACAATCCCTTGGTCTTTCATGGC  
AAGAAATATTAGGCATCAATACCACCAGGCCTTATAAAGTTCATCGAAGAGCGATTACCAAAGAC  
TAAGAGTTCTGGATTGCCATGACACACAGAAATTATCTATGCCGAATTCATGCAGGAGCCTTGATA  
AGATGGTGGCTAAGGCTCCCTATTTCTTTTATGGGAATGTAATGAACTTATCTCATGACTCTGGG  
TAAGAATATCACAGTTTTTGTATGCCATTGAGCCAGAATTTGTTTACTCACTTTTCTCAGCTC  
TGAGTCGTAAAGAAGTTATGTACATAATCTTCTAGTGAAAATCGATTTACATTGTTCCGAAAC  
CACCAATGACGATTCAGAAGCAGTTCCAGTAGCAAAAAATGGTGGCCATCATGGGATACAAGGA  
AACACTTGAACGGCATCAATTCTGAGACATCTGTTGTATCTCAGCTATGTGATAGGCTTGAAAGAA  
CAGTGAGTGATGCCAGGGGTTTCTTTCAGTTGACAGACAGAGAGATATCCTCAACCAGTCCCAGA  
TATTTAATCTAGTCTGGGTTGGCCGCTACAAATGGCAGCTGTAGGGCCAGAACAATAGAACGTA  
TTCTGGGCTACCCAGAAAATCACACTCGAGTTGCTGCATTTAGCTTGTGAAAGACTTCTATCTC  
TGAAACATTGCTTCCAGGTAGATACATTGGCTTATTGTCTCTCTGGATTGAAGCATTGTACCCTG  
GAGGGTTGACTGTGTTGTCAATCTATAGTGGTATTGGTGGAGCAGAAGTTGCATTGCATCGCCTTG  
GTATTCGCTTAAAAGCTGTTGTCTCAATAGAGGCTTCTGAGAAAAACCGGAGAATTCTCAAGCAAT  
GGTGGAGTAGTTCAGGACAAACAGGAGAACTCGTGCAGATGGAAGACATCCACAAGTTGGCCAGTA  
ACAAGGTAGAGGTCTTGATTAACAACCTTGGTGGTTTTGATTTTCATCATATGCCAGAACCATGTA  
CATACTCTTCTAAAGGTAATTTAGCTGCAGATATGGATAGTCATGCAAGTTTAGATTTTCATGTTGT  
TTCATGAGTTTGTTCGTGTCCTCCAACGTGTAAGAAGCACAAATGGGGCGGAATTAGCAAGTTCCTT  
AGCTTTAATCTGTAGGCACTTAGTGAACCTGAGCTTAATGTTATGTTGTCCTGGATTATGACTTCTA  
CTTTGTAATATATTAAGCTTATATTGTGAATGGTCCATTACATTATTGTAAAAAAAAAAAAAAAAA  
A

**i*****SIDRM9***

TAGCGAAAAAGTTTCTCTGTTAAAGCAAAAAACGGAGAGGACTTTCTCGTCCAGTGTTGGAAGCG  
TAAAACCTCCAAATATGGGAATCTCTCTTATGCTTTAAAACCAAACAAGAATCTCTTCTTCGTCAAT  
TTTCTCTAAAATCTATGGATATCTGATATAGATCAAATTGATTGTTGCATTGATCACTGAAAAAT

Supplementary Figure 10 (Hong)

---

TTCAGGGTGCTGATTTATTCTTCTTGCTGAACAAATTGGAGTTCTTTTTTCAGGCTTACCTTGAGAA  
ATGGACAAAAATCTTCTGGAGAAGATAATGATGACATTGACTGGGATACTGAAGATGAACTTGAA  
ATACAAGAAATACAGGACACAGTGTTTTCTCATGCACGGATTTAAGAACTACTGGGCAGCATGTT  
GTTTGTTCGCATGTGGAGGCAAGCTCGTCATCAGTACCCTTCCGGTCCAAGTTCATTCAGCAGTTT  
GTAGTGATGGGATTTCTGAAGAATCTATTGCAAAAGCAATAGAGCAAAACGGAGAAAATTCAGAT  
TTGGTGCTGGATTTCTCTTTTGACTTTTAAGGCCCTTGATGACTCTCTGAAGAACAGCCCAGTGTT  
AGCCCTCCGCTGGAACCCTCCATTAGTTCTGATGACAGCGCTTCTGAATACAACAAGATTGTTTTG  
GATAATGTTTATGAGGATGATAGTTGGTCTTCTGACTCAGACAACCTACATAAATACTGTAAAGCAG  
TGCTACTTGAATGACGAGGGAAGTTCTTTGTCTGAAAAAGAAAAGATGTTATTGTTCTGGGAAAT  
ATGGGATATCCAGCGGAAGAGGCCCTCCATAGCAATGGATAGATGTGGTCCAAAAGCATCACTCCCT  
GAATTGGTAGATTTTATTTGTGCTGCTCAAATGTCAAGAGCGGAAGATCCCTATCTCTAGAAGAT  
GTGAAGCCAAACCTGAAGGATATATTGAATGATTGTGGTGGATACAAAAGAGGAAAATGTACAAT  
GAATTGTGCAAAACGGAAAAGCAAAGGGAGATTTCTGTTGAAGAGCCAATTTCGATTGCCCAAGCCG  
ATGATTGGCTTTGGAATTCCTACCGAATCAGTTCCAAGAATGGTTCAACGAATTCCTCCCGAGAAA  
ATCATTGGCCCCCTTATTTCTATTATGAAAATGTCGCCCTGGCTCCAAAGGGTGTGTGGGACACC  
ATTAAGAGGCATTTGTATGAGATTGAGCCCAGTTTTGTTGACTCGAAGTACTTTTCTGCAACTGCA  
AGAAAAGAGGGTATCTTCATAATCTGCCGATTGAAAACAGATTTCTTTGTTTTCCACTTCCCCCA  
CGGACCATTGATGAGGCACCTTCCCCTTTCGAAGAGATGGTGGCCATCTTGGGATACTAGATCAAAG  
TTGAACTGCTTACAAACAGCCATTGGGAGTGCAAGGTTGACGGATAAGATCAGGAAAGCTGTGAG  
AAGTATGATGGTGAACCACCTATGGAAAATACAGAAGTATGTACTCTATCATTGCAAGAAGTGGAAT  
TTGGTCTGGGTAGGAAGAAACAAAGTTGCCCTTTGGAACCTGATGAAGTTGAAATGCTATTGGGG  
TTCCCAAAGAATCACACAAGGGGAGGAGGTATAAGTAGGACGGACAGATACAAGTCACTCGGTAACT  
TCTTTCCAGGTTGACACAGTGGCGTACCACTTATCAGTGTTGAGAGACTTGTTTTCCAAATGGAATC  
AATGTCTTATCACTCTTCTCTGGCATTGGTGGTCTGAAGTTGCTCTCTACCGTCTCGGTGTTCCC  
CTCAACAATGTTGTTTCAGTTGAAAAGTCTGAAGTGAACAGGAATATTGTGAGAAGCTGGTGGGAG  
CAAACAAATCAGAGGGGGAATCTCATACATTTTGACGATGTGCAGCTGCTGAGCAGAGATCGGTTG  
AAGAAGTTAATAGAATCAGTTGGTGGATTTGATTTAGTGATTGGTGGAAAGCCATGCAACAACCTT  
GCAGGCAGTAACAGGGTGAGCAGGGATGGGCTTGAAGGCAAAGAGTCTTCTCTGTTTTTTGATTAT  
GTTCCGATATTGGATGATGTCAAGTCCATAATGTCTAGACATAGATGAGATACTCTCTCTGATTTA  
GATATCCTATTCTTTTTCTCAACCTTGCCAAGGCTTAAGGTTATTCTTAATTAGTAGGGTGAAAT  
CAAACCTAGATACTAATTGCAATTATGAAACTGATGAAATTTTGGTGGTTGATGAAGTAATGTTATT  
GTTTCTGGTTCAGTTTTTCCAGAACCAGGTATCTAAAGAATATATAAGAGTATACCAAAAAAAAAA  
AAAAAAAAAAAAAAAAA
